# Supplementary material for: Functional Characterization of Heat Shock Factor (CrHsf) Families Provide Comprehensive Insight into the Adaptive Mechanisms of Canavalia rosea (Sw.) DC. to Tropical Coral Islands
Source: Int J Mol Sci. 2022 Oct 15;23(20):12357. doi: 10.3390/ijms232012357 (PMC9604225; doi:10.3390/ijms232012357)
Supplement: Supplementary file 1 [file ijms-23-12357-s001.zip]

Archive with 5 entries (5 files):
- Supplementary material of CrHsfs Ms-20221014.pdf
- Table S1.xlsx
- Table S2.xlsx
- Table S3.xlsx
- Table S4.xlsx
