# Supplementary material for: Functional Characterization of Heat Shock Factor (CrHsf) Families Provide Comprehensive Insight into the Adaptive Mechanisms of Canavalia rosea (Sw.) DC. to Tropical Coral Islands
Source: Int J Mol Sci. 2022 Oct 15;23(20):12357. doi: 10.3390/ijms232012357 (PMC9604225; doi:10.3390/ijms232012357)
Supplement: Supplementary file 1 [file ijms-23-12357-s001.zip › Table S1.xlsx]

## Sheet: Protein sequences
The sequence information of the CrHsf family
>CrHsf1	MVKSNDNGSGSGLGSVPPFLNKCYEMVEDHNSDSIIRWNDGGDSFIISDITQFSVALLPSYFKHNNFSSFIRQLNIYGFRKIDTDCWEFANENFVRDQKHLLKNIRRRKHPHTADQQKALPQQDNCDEPSQEAAAHHGLWKEVENLKSDKNSLMQELVKLRQHQESSENKLLLLSDRLQGMEKHQQQMLSFLVMVVQSPGFLVQLLQPKENNWRLAEPGDILDQDKQDGKSVASDGMIVKYKPPVGEKLKPVVPRSPGFDKQPEPELSADGLKDLCISSEFLKVLLDEKLCPLENHSPFLLQDLPDDGLWEQLFLGSPFLGNVQDSNNENEEHTVTGMEMEPTISETPDENCQTFESMLVEMDKTRE
>CrHsf2	MDEAQGSSSSLPPFLAKTYEMVDDPSTDSIVSWSVTNKSFIVWNPPDFARDLLPRFFKHNNFSSFIRQLNTYGFKKIDPEQWEFANDDFVRGQPHLMKNIHRRKPVHSHSLQNLQAQVPLADSERQSFTHEIEKLKHDKEQLLVELRRHQHEWQSYEIQIHCSKDRLEKLEQKQERMVSSVSQVLQKPAIAVNILPLTETMDRKRRLPRSGYFNDEASIEDADETSQMLLRENAENTSVLTLNMGRLDQLESSVAFWEAIAQDLGDAFSQIQSNMDFDESTSCPDSPSISCAQLDVEVRPKSSGIDMNSEPTAAAIPEPVASKEQPVGTTVAATGVNDVFWEQFLTEDPGASEAQEVQSERKDYDGQKNEGKPSELGKFWWNMRNANNLPEQMGHVGQA…
>CrHsf3	MDGVPPSAAGGAGGPAPFLMKTYDMVDDSSTDDIVSWSSSNCSFVVWNPPEFARLLLPTYFKHNNFSSFIRQLNTYGFRKIHPERWEFANDDFMKDQKHLLKNIHRRKPIHSHSHPPGSLVDPERAAFEEEIEKLSREKTSLESNIYSFKQHQSTAKPRLEDFLQRLDGIEKRQKQLLNFFEKALQNPTFVEHLSRKIESMDLSAYNKKRRLPQVDHTQPVAESSFVDSHSNFRMEFGNVFHQDFSNKLRLELSPAVSDMNLVSRSTHSSNEDGESPQKKLSEVEPKGLQTRTPLAFAPETLELADTGTSFTFKMDSCLSRRATTSESQKLHSLEPSSDEGDSHISCQLNLTLASCPLQVNRNSYSARSPQIDCQEIGKLAESRLFANGKESDSGISSN…
>CrHsf4	MDGASSGGGEVTTPAPAPAPIPNANAPPPFLSKTYEMVDDPSTDSIVSWSPTNNSFVVWNPPEFARDLLPKHFKHNNFSSFVRQLNTYGFRKVDPDRWEFANEGFLRGQKHLLKTITRRKPAHGHNNQQTQPSHGQSSSVGACVEVGKFGLEEEVEILKRDKNVLMQELVRLRQQQQSTDNQLQTMVQRLQGMEQRQQQMMSFLAKAVQSPGFLAQFVQQQNESNRRITEANKKRRLKQEGIGEMENAAASDGQIVKYQPLVNEAAKAMLRQIMKLDTSRLEPFGNNPDSYLIGEHSSSSSAVDRGNSLGRSSGVTLQEVPLTTVQSSHIPSTGTQGHTLSAGRSDILTSSQVAACEEVTNAKYPNINVSVREPDAPSVPVPQADEIMPDLSPIPDLVA…
>CrHsf5	MGDNVLELNLGLGNFPSHVGQSPRPRCPAPFLLKTYDLLEEGEAEDGSSKIVSWNSQGTAFVVWSPAEFSEFTLPRYFKHNNFSSFIRQLNTYGFKKISSKRWEFKHEKFQRGCRHMLAEITRKKCEPSVFPAYLKSSSEENAMTSTEDNNHQLLMEENKNLKKERLELQMQIAECKALEVKLLACLSVYGQSPK
>CrHsf6	MALLLDNCEGILLSLESHKSVPAPFLTKTYQLVDDPTTDHIVSWGEDDTTFVVWRPPEFARDLLPNYFKHNNFSSFVRQLNTYGFRKIVPDRWEFANEFFKKGEKHLLCEIHRRKTAQPQQGTISHQHHSHSHSPLGVNVPSFFPFSSRLSISPSNDSDEQPNWCDSPPRGPVNGAVNYSSSVTALSEDNERLRRSNSMLMSELAHMKKLYNDIIYFVQNHVKPVAPSNSYSSSLLLCNTPQGAATISSGNNVSMMQRPMNQLLGYYSTNPKQNTAQYSQPQTYVVNSPTNTSRSSVTIVEGPGTNTCKTKLFGVSLQSKKRVHPDYGSSNPTNSDTNKARLVLEKNDLGFNLMPPSTC
>CrHsf7	MKGVTVKVEETVAYGGGAAGHASASSSSYSSSSTSSTFSPQPMEGLHEVGPPPFLTKTFEVVEDPSTDSIVSWSKARNSFVVWDSHQFSTTILPRYFKHCNFSSFVRQLNTYGFRKIDPDRWEFANEGFLAGQKHLLKTIKRRRNVTQSQSQAQGGACIELGEFGFEGEIERLRRDRTVLMAEIVRLRQQQHNSREQLLTMESRLQATERKHQQMMTFLAKALSNQTFVQNFLHRNAQNKELQGVRRKRRLTASPSVENLQQDPVIGTVPIDEEQEEELATTIESQMESFFSAACDDESSTEIKDPVSSAVPTASGSDLGSVWEDLLNQDLVAGNPADEVVIGDFSQIDVPVEDLAAKADDDWTEDLQSLVDHMGYLGSRP
>CrHsf8	MEGGISEKGLLECGRKCSPPPFLLKTYMLVEDPATDDVVSWNAEGTAFVVWQPAEFARDLLPTLFKHSNFSSFVRQLNTYGFRKVATSRWEFCNERFKKGERELLCEIRRRKAWANNKQQPNVPNQSTPQDSDEDQRSSSTSSSSGYTSLVDENKRLKKENGVLNSELTNMKRKCRELLDLVAKYSSHAKKEEENDQRPMLFGVRLDVQGGRDMKRNRAEISESASIMLSQSCK
>CrHsf9	MNYLYPVKEEYLEEAAASSSSTCDIGGGDEAEMVPPPRPMEGLHEVGPPPFLTKTFDAVEDPTTSHIVSWSRGGASFVVWDPHAFSRDLLPRYFKHNNFSSFVRQLNTYTFRFLLFLVPALGLAEFGIMGFRKIDPDRWEFANEGFLRGQRHLLGNIRRRKQACQASTSQQAQQGHCVEVGRFGLDEEIERLRRDKLVLMMELVRLRQQQQNTRSYLQAMEERLRGTEVKQHQMMAFLARALKNPTFIHQLLQQKEKRKELEEAMSKKRRRPIEQGPGGVGESSSGGGGRNSVKVEHLLFGEYGFQVSELEVLAMEMQGFGRGRRDQEEDPDPLASESHERLDKELDEGFWEELFSESFEGELDIPTSQGEDEDEDVNVLANRLGYLGSSPN
>CrHsf10	MNSNVITVKEEFPGEEEGESYVVAQQPQPQPMEGLHESGPPPFLTKTYDIVNDGSTDDIVSWSRGNNSFIVWDPQAFSITLLPKYFKHNNFSSFVRQLNTYGFRKVDPDKWEFANEGFLKGQRHLLKNIRRRKTTQIQPSPQALDPCVEVGRFGLDGEIDRLRRDKQVLMVELVKLRQQQQNTRSHLQSMESRLQKTEQKQQQMMHFLARAMKNPDFLQQLVQQKEWKKELEEALCKKRRRPIDQGPCNVEVTELNYAEECSAFIKLGPQEYNDMSELEICDMDLVVNLEEQSGSQKNNEEEKLGAELESGNEDIEEVFWEDFLNESTAQDLLVLKEDDDDLSVLVEELGYLASTPK
>CrHsf11	MNYTYPVREEYIEASSSSYESSGEYVATIPPPQPMERLHDTGPPPFLTKTFDVVDDPTTNHVVSWSKDGTSFVVWDPHAFSTVLLPRYFKHNNFSSFVRQLNTYGFRKIDPERWEFANEGFRRGHRQLLRNIRRRKGPCQVTQGKKCVEVGDCGVDEEIDRLRHDKRVLMMELVNLRQQQQNTRMCILEMEQRLQGIEIKQQQMMEFLARAIRNPSFIDQLFQQNKRKELEETLTKKRRRQIEVGESSSEGEGRRTVKVEQLEFGDCEFGVSELEMLALEMQGFGKGRIEKEAPESQDKLHRELDEQFWEEVLFGDKFEGRLDIPTAKDKDEAVNILANQFGCLDSSH
>CrHsf12	MEGESDKGLLLEYVRKSTTPPPFLLKTYILVEDPTTNDVVSWNEDGTTFVVLQPVEFARDLLPTLFKHSNFSSFVRQLNTYGFRKVATSRWEFCNDRFRKGEKELLCDIRRRKTWACKQQPTIAPIQATTQNSIHEDHRSSSASSSSGYATLVDENKRLKKENGVLSSELTIMKRKCRELLDLVAKYTNTKEEREDERPMLFGVRLEVQGEREMKKRRDEISESTSILLSRS
>CrHsf13	MGRKFREKKENYHHRKHFARHSHSMAPPVEHNGDSSAGESQRSIPTPFLTKTYHLVDDHSIDDVISWNDAGSSFIVWNPTVFARDLLPKYFKHNNFSSFVRQLNTYGFRKVVPDRWEFSNDCFIRGEKRLLCEIQRRKIPSTSPPAASNVGPTATIAVPSPLPLSTIPTAKPIVSPSNSGEEQAVSSNSSPSRAPADLLDENERLRKENIQLTKELEEMRSLCNNILSLMSNYANAQADDGMQGREFGSAAAKTLHLMPTKRCSSDDAAVMEEISPKLFGVAIGTKRGREEGRGSEHDTVLSLHQPFHANVKSEPFDFQRHGKNGRMPWLNQCHRANQRVCN
>CrHsf14	MNPHGGVKEEFLGGESSRFYGGYETQSMVVVPQPIEGLNETGPPPFLTKTYDIVDDPSTNHIISWSTGNNSFVVWDPQAFSITLLPRFFKHNNFSSFVRQLNTYGFKKVDPDRWEFANEMFIRGQRILLKNIRRRKANQSQAMMQQQGVEACVEVGQFGLDGEVDRLKRDRQVLMVELVKLRQQQQNTRAHLKAMEGRLKRTEQKQQQMMNFLARAMQNPNFVQQLVQQKEWRKELEEAFSKKRRRPIDQGPSNVVEVGELGCVEECSNFVKLEPQEYTDDKLLEFEVDLALNMEGQRRSQNNMEELDHIQFESRDGKDIDEVFWQNLLNEGIEDEDVLGIEDVDVLAEQLGYLASTPK
>CrHsf15	MEGSGPAPFLLKTYEMVDDSSTEEIVSWSSTNNTFIVWNPADFSRLLLPTYFKHNNFSSFIRQLNTYGFRKVHPERWEFGNEDFVKDQKHRLKNIHRRKPIHSHSHPPGSAMDPERSAFEEEIENLSHEKTTIQSNIYRFQQHHSVTKVHLQDLQHRLDDMEKRQKNLLNFFEKALQNPTFVEQISRKIDFMDLSAYNKKRRLPQVDAQNTFVDNSAMQFANISHQDFANKLRLELSPTVSNINLVSCSTNSSNEDGESPHKMLGEGEPKEGNASTDLGFVCPKLNSLEPNCEEDEGYISCLLNLTLASSPLQVKRNSCTDRSPQIECPEIGKLEESKFYGNDDKESDVGASSSRNMTEEVGNLDSSHEAPSNNQETPTGPVRVNDMFWEQFLTERPGC…
>CrHsf16	MSQRSTPAPFLTKTYQLVEDPATDDVISWSTSGNTFVVWKHADFAKDLLPKYFKHNNFSSFVRQLNTYGFRKIVPDKWEFANENFKRGQKELLAEIKRRKTVSQSPAAEKTVGCGGGNNSSLNSGGDDMGSTSTGSMMELTTQCADLSGENEKLKKDNEKLSCELACAKKQCDELVAFLRDSVNAGPEVINRILGQGTRGSSPDAVRFDDDDDEEENAVGECECKGSGGESLKLFGVWLKGEDGKENLNIAANGNCRKRGRQDPIAAGAKQLKTVVYDIHIS
>CrHsf17	MGEEQVRVKAELLDDNARSNSELTEEATVHVKEEVLDDAAVNGSSSSSSSIQLPKPMEGLHEMGPPPFLKKTFEMVEDTDTDPIVSWSQTRDTFIVWDSHEFSKTLLPKYFKHSNFSSFVRQLNTYGFRKVDSDRWEFANEGFQGGKKHLLKNIRRRSKYNKLHQAMKPGLEAEMEKLKKDQNMLKVEILKLRQQQDNSNFQLTNVQERIRSAELKQYQMIFFLTRMARKPAFVEQLIQKIKRKRELDGNDMDKRPRLLGTPCHVTFPSTPNVDYRHQGFQSELNGLLSETVNTGRMEPPTHSTVEDGLCSSVQGLRAYGSRTGAQDVSSAYHVMSEKLMGENPVVDEELDVNDSNIYLELEDLITKPADWVGSASGLVGQTS
>CrHsf18	MAFTLDRCEDSVVFTMESQKSVPAPFLTKTYQLVDDPHTDHIVSWGDDETTFVVWRPPEFARDLLPNYFKHNNFSSFVRQLNTYGFKKVVADRWEFANEYFRKGAKHLLCEIHRRKTPHHYQQHYHDQPTQLFEPDENLCWIDTPSPSPKPGTDILTALSEDNQRLRRKNFMLLSELTHMKNLYNDIIYFIQNHVSPAPFEQRSSNAILKLVELDSSSQSPNAIKPSKSSIMEKTMITCREEPNSSVKLFGVPLCGKKRLHSGNLDQLE
>CrHsf19	MEGIKVKEEETVTCATGSSSSSSSFFSQPMEGLHEVGPPPFLTKTFEMVEDPSTDSIVSWSTTRNSFAVWDSHNFSSNILPRCFKHSNFSSFIRQLNTYGFRKVDRDKLEFANEGFLAGQRHLLKTINRRRNVSKGMQQRGGSGGCVEVGEFGLEGELDRLKRDENVLMAEIVRLRQQQLNSMDQLSSMDARLQATEKTTTNDDFPCQSTK
>CrHsf20	MALVVDNCESILLSLDTHKSVPAPFLTKTYQLVDDPSTNHIVSWGEDHTTFVVWRPPEFARDLLPNYFKHNNFSSFVRQLNTYGFRKIVPDRWEFANEFFKKGEKHLLCEIHRRKTPHHHHHHHHHHQQVPSHQFPPNFFPFHNRLCVSPPNDSDELANWCDSPPLTSPTPPSTNNYNTTVTALSEDNERLRRSNSMLMSELAHMKKLYNDIIYFVQNHVKPVSPSNSCPSYLLCNNNNNNTSAHASPLTLQRQMNQFLGSYSCNAKQAHAVNSPTNSSVTIVEEPNGNGNGNSCNTKLFGVSLQSKKRVHPEYESNNHVSGETNKARLVLQNQDLGLNLMPPSTYC
>CrHsf21	MAPPPPVEHNGDSSASAAESQRSIPTPFLTKTFQLVDDQSIDDVISWNEDGSTFIVWNPTVFARDLLPKYFKHNNFSSFVRQLNTYGFRKVVPDRWEFSNEYFRRGEKRLLCEIQRRKISSPAPSPTAAPVAAATVAVPTPMPLTAIPTAMPIISPSNSGEEQVISSNSSPSRAPAELLDENERLRKENVQLTKELAEMRSLCNNIYSLMSNYANANNNNQTEGGAQGSRESGMTAVKPLDLMPVKRSSNEYLVERGAEEMNPKLFGVAIGAKRAREGRGSGGGGVAGEEDTLLRLHSPSSADVKTEPLDCQNHRDNQQTPWLNQCHRTNQRVCN
>CrHsf22	PLSLSHRHTHSLSHTHTHTNSTHTFAVPTHHPSLLFLNGMELHHNNTATNNNTNNSNNNNVIAPFVIKTYHMVNDPSTDKLITWGPANNSFIVFDPLHFSHSLLPAFFKHNNFSSFVRQLNTYGFRKVDPDRWEFANEWFLRGQKQLLKNIVRRKHGGGGRHLHNQGKVEDLDEEAMVMEIARLKEEQKALEEELQGMNKRLETTEKRPQQMMAFLCKVVEDPHVLSRILQEREKKHLGDKKRRLIPPATSSSSSSGMALSNSVKTEFEEDEPTVGNNIASSSPETGFEIDNFCSPSPPHEAATTAGFWGQVQAGVMDRGRIGGQGYSYNCAAAPTPLTVMSPAAATMGGGYFGCENNSNSKGRGSIFSEMAAENSSLPPYPFSLLEGGF
>CrHsf23	MEGASWNTVSVAPFLSKTFDMVDDPSTDSVVSWGHNNNTFVVWNVPQFATHILPKHFKHNNFSSFVRQLNTYGFRKVDPDRWEFANEGFLKGKKQLLKTISRRKSAHVNGSQQPAQVHNSPVRACVEVGKFGLEEEVERLKRDKNVLMQELVRLRQKQQVTDNQLQNAGQRVQAMEQRQQQMMSFLAKAMQNPGFLAQFVQQQNEGNRHITGGNKKRRLHRQDDSLATKDLHNALDGHIVKYQTSINEAAKSLFRQILQINSSATTESSIKNPDVFLLDDIPSAVALDSSSSSTHISGLTCMEVGSQFPVNCTSNSVSEVQSSPVVSTDCVKTAEFPELTVHNCQENVLDLCKSQEMETDSSVVNNDLNVVGTDTRNMGEIDMMSAVLDGTHSVEADHF…
>CrHsf24	MAPLPAEQTGESAPLESQRSIPTPFLTKTYQLVDDPSADDLISWNEDGTSFIVWRPAEFARDLLPKYFKHNNFSSFVRQLNTYGFRKVVPDRWEFANDCFRRGERGLLRDIQRRKILPVAPTTAAAAVTANTVTVAVAAPAARAVSPTTSGDEQVLSSNSSPIAAHNCNTVHRTTSCTTAPELLEENERLRKENMQLSHELSQLKGLCNNILALMTNYASGFSRQQLESSTSAPRAAPVPPEGKALELLPAKHVPVAEDALHVGGCAGATPIAVEAEVPKLFGVSIGLKRCRTECQPEAEGEEQNQTQTLTQTQSSHEPDRGSDVKSEPLDGDDSDDQDPRWLELGK
>CrHsf25	MSQRSVPAPFLTKTYQLVDDPGTDEVISWSESGNTFVVWKHADFAKDLLPNYFKHNNFSSFVRQLNTYGFRKTVPDKWEFANEHFKQGQKELLSKIRRRKTVSQPSSQPPEAGKSGGDGNSPSNSGGDDVGSTSTSTSSSGSKNPGSVETTTPNQLSSENEKLKKDNETLSWELARARKQCDELIAFLKERLKVGPDQIDRIMRCGSNENAVGEEKRESLKLFGVWLKEETSPHKRNNQKRAREDQMGFGGPRLEDSKTVVDFGAVNVMMKSSKVCN
>CrHsf26	MEGGGGGSTTPAAPIPNANAPPPFLSKTYDMVDDPATDAVVSWSGTNNSFVVWDPPEFARDLLPKYFKHNNFSSFVRQLNTYGFRKVDPDRWEFANEGFLRGQKHLLRNITRRKPAHGHNHQPVQQPHGQSSSVGACVEVGKFGLEEEVERLKRDKNVLMQELVRLRQQQQTTDNQLQAMVQRLQGMEQRQQQMMSFLAKAVQSPGFFAQFVQQQNESNRRLTEVNKKRRLKQEGNAETEHAASPDGQIVKYQPLMNESAKSMLRQIMKWDSSRTESFNKNPDNYMIGDGSSSSSAMDSSSSSSWTSGVTLQEVPPTSVQSSHVPAATGTQGHIPSADKPEILSVPQAVASEKVKKDGTHDVPSIPVSQVDVIMSDLPPITEMVAGSILDIPEENYMAP…
>CrHsf27	MAFSLDRCEENMVFTFESQKSVPAPFLTKTYQLVDDPRTDHIVSWGEDESTFVVWRPPEFARDLLPNYFKHNNFSSFVRQLNTYGFKKVVADRWEFANEYFRKGAKHLLCEIHRRRTPQQHNQLFNDQPQSQILQQDESLCWLDTPLPSPKPSTDILTALSEDNQRLRRKNFMLLSELTHMKSLYNDIIYFIQNHVKPAPFEQRNNSGVIPKLVELDSFPESQNEIGILRTAKSRIIDKSLITEESNSSVKLFGVPLSGKKRLHPDNIN
>CrHsf28	MEEAQNSSGSLPPFLSKTYEMVDDPSTNSIVSWSATNKSFIVWNPPEFSRDLLPRFFKHNNFSSFIRQLNTYGFRKIDPEQWEFANDDFVRGQPHLLKNIHRRKPVHSHSLQNVQSQGTVPLTESERQNLKDELEKLKHEKEQLLLVVKRHEEEERMYEIQMQCSKDRLEKLEKKQQTMLCSVSQVLQKPGIGFNLFQLTENVDRKRRLPRSGLLSDDASIEDHIETSHVLPRENAESDSIFSLNMDRLDMLESSMAFWENLARDVGDTFVQSHSSMDFDESTSCADSPTISCVQLDVDVQPKSPGIDMNSEPTVAAISDLGAFKDQPVATAPVATGVNDVFWEQFLTENPGSSEMQEARSERKDSDIRNNDGKPTDHGRFWWNIRNVNNLPEQMGHS

## Sheet: cDNA coding region sequences
The sequence information of the CrHsf family
>CrHsf1	ATGGTAAAATCGAACGATAATGGTTCTGGTTCGGGTTTGGGTTCGGTGCCTCCTTTCTTGAACAAATGTTACGAGATGGTTGAGGACCACAACTCCGACTCCATAATCCGTTGGAACGACGGCGGTGACAGTTTTATCATCTCCGACATCACTCAATTCTCCGTCGCACTCCTTCCCTCATATTTCAAGCACAACAATTTCTCCAGCTTCATCAGGCAGCTCAATATCTATGGTTTCAGGAAAATTGATACGGATTGCTGGGAATTTGCCAATGAAAACTTTGTTAGGGATCAGAAGCATTTGTTGAAGAATATTCGTAGACGGAAACATCCACACACTGCTGATCAGCAGAAAGCATTGCCGCAGCAGGACAATTGTGATGAACCATCACAGGAAGCA…
>CrHsf2	ATGGATGAAGCGCAGGGTAGTTCAAGTTCTCTGCCTCCATTTCTGGCAAAGACTTATGAGATGGTGGATGATCCTTCCACGGATTCGATTGTTTCATGGAGTGTCACTAACAAAAGTTTTATTGTATGGAATCCCCCAGACTTTGCAAGAGATTTGCTGCCTAGATTCTTTAAGCACAATAACTTCTCAAGTTTCATCAGGCAGCTCAACACATATGGATTTAAAAAGATTGACCCAGAACAATGGGAATTTGCCAATGATGATTTTGTAAGAGGGCAGCCTCATCTTATGAAGAACATACATAGACGGAAGCCAGTTCATAGCCATTCTTTGCAGAATCTTCAAGCACAAGTCCCGTTGGCCGACTCAGAAAGGCAGAGTTTTACCCATGAAATAGAG…
>CrHsf3	ATGGACGGAGTGCCGCCTTCCGCCGCCGGCGGAGCAGGAGGTCCGGCGCCGTTCCTAATGAAGACCTATGACATGGTAGACGATTCCTCCACCGACGACATCGTTTCTTGGAGTTCGTCTAACTGCAGCTTCGTCGTTTGGAACCCGCCTGAGTTCGCTCGCCTTCTTCTCCCAACCTATTTCAAGCACAACAACTTCTCCAGCTTCATCCGCCAGCTTAATACCTACGGATTTCGAAAAATACATCCTGAGCGGTGGGAATTTGCTAATGATGATTTTATGAAAGATCAAAAGCATCTTCTTAAGAACATACACCGCAGGAAACCTATTCACAGTCATAGTCATCCTCCAGGTTCTCTTGTGGATCCAGAAAGGGCAGCATTTGAGGAAGAAATAGAG…
>CrHsf4	ATGGACGGAGCGAGCAGCGGTGGCGGAGAAGTGACGACGCCGGCGCCGGCGCCGGCGCCGATTCCGAACGCGAACGCGCCACCGCCGTTCCTGAGCAAAACGTACGAGATGGTGGACGACCCTTCTACGGACTCGATCGTGTCTTGGAGCCCAACGAACAACAGCTTCGTGGTTTGGAACCCTCCCGAGTTCGCGAGAGACCTCTTGCCCAAGCACTTCAAACACAATAACTTCTCCAGCTTCGTTCGCCAGTTAAACACCTACGGTTTTAGGAAGGTAGATCCAGATCGCTGGGAATTTGCAAATGAGGGGTTTTTAAGGGGTCAAAAGCACTTGCTTAAGACTATAACTCGGCGAAAACCTGCTCATGGCCATAATAATCAACAGACGCAACCATCA…
>CrHsf5	ATGGGTGATAATGTGTTGGAGCTCAACCTTGGTTTAGGTAACTTTCCTAGTCATGTAGGGCAGTCACCAAGGCCAAGGTGCCCCGCACCCTTCTTATTGAAGACTTATGATTTGTTGGAAGAAGGTGAAGCTGAAGATGGCAGTTCCAAAATTGTGTCATGGAATTCACAAGGAACTGCTTTTGTTGTGTGGTCTCCAGCTGAGTTCTCTGAGTTCACCTTGCCTAGATATTTCAAGCATAATAACTTCTCTAGCTTCATTCGCCAATTGAATACATATGGATTTAAGAAAATATCATCCAAAAGATGGGAATTCAAGCACGAGAAATTTCAGAGGGGTTGCAGACATATGCTAGCTGAAATTACAAGGAAAAAGTGTGAGCCAAGTGTATTTCCTGCG…
>CrHsf6	ATGGCTCTTCTTCTAGACAACTGCGAAGGGATCTTATTGTCTTTGGAGTCACACAAATCGGTGCCAGCTCCATTCCTTACAAAGACATATCAACTGGTAGATGATCCCACCACAGACCATATAGTCTCTTGGGGTGAAGACGACACCACCTTCGTCGTTTGGCGTCCCCCTGAGTTCGCCAGAGACCTTCTTCCCAATTACTTCAAACACAACAACTTCTCCAGCTTCGTTCGCCAGCTCAACACCTATGGTTTCAGAAAGATTGTGCCGGATAGATGGGAGTTCGCTAACGAATTCTTCAAGAAAGGAGAGAAGCATTTGCTGTGCGAGATCCATAGAAGAAAAACTGCTCAGCCTCAGCAAGGAACCATCAGTCACCAACATCATTCTCATTCACAT…
>CrHsf7	ATGAAGGGAGTTACAGTGAAAGTGGAAGAGACAGTGGCATATGGTGGTGGTGCAGCAGGTCATGCTTCTGCTTCAAGCTCTTCTTATTCTTCCTCTTCAACTTCTTCAACCTTCTCTCCCCAACCTATGGAAGGTTTGCACGAGGTGGGTCCTCCTCCATTCCTCACCAAAACCTTCGAAGTCGTCGAAGACCCATCCACCGACTCCATTGTATCGTGGAGCAAAGCACGCAACAGCTTCGTCGTTTGGGATTCTCATCAATTCTCTACCACCATCTTACCTCGTTACTTCAAACACTGCAATTTCTCCAGCTTCGTTCGTCAACTTAATACCTATGGATTTAGGAAAATTGATCCTGATCGATGGGAATTCGCGAATGAAGGGTTTTTGGCAGGACAG…
>CrHsf8	ATGGAAGGAGGAATTAGTGAGAAGGGGTTGTTGGAATGTGGAAGGAAGTGTAGTCCACCACCGTTTTTGTTGAAGACATATATGTTAGTAGAGGATCCGGCAACCGACGACGTCGTTTCATGGAATGCGGAAGGGACGGCGTTTGTGGTGTGGCAGCCGGCGGAGTTTGCTCGTGATCTCCTCCCAACACTCTTCAAGCACAGCAATTTTTCCAGCTTTGTCCGTCAGCTCAATACCTATGGGTTTCGTAAAGTTGCAACAAGTAGATGGGAATTTTGCAACGAGAGGTTCAAGAAGGGTGAAAGAGAACTACTGTGTGAGATTCGGCGAAGAAAAGCTTGGGCCAACAACAAGCAACAACCTAATGTACCAAACCAAAGCACACCACAAGATTCTGAT…
>CrHsf9	ATGAACTATCTTTATCCAGTGAAAGAAGAGTACTTGGAAGAAGCAGCAGCTTCATCATCATCAACGTGTGACATAGGAGGTGGTGATGAAGCAGAAATGGTTCCTCCTCCGAGACCAATGGAGGGGCTTCATGAAGTAGGACCACCACCATTTCTGACCAAGACTTTCGATGCAGTGGAGGACCCCACCACCAGCCACATAGTTTCATGGAGCAGAGGCGGTGCCAGCTTTGTGGTTTGGGATCCACACGCTTTCTCCAGAGACCTTCTTCCTAGATACTTCAAGCACAACAATTTCTCTAGCTTTGTCAGGCAACTAAACACTTACACTTTTAGATTTCTCTTATTTCTCGTACCTGCTCTTGGTTTGGCGGAGTTTGGCATCATGGGTTTTAGAAAA…
>CrHsf10	ATGAATTCTAATGTGATTACTGTGAAGGAGGAGTTTCCTGGAGAAGAAGAAGGAGAAAGTTATGTGGTTGCTCAACAACCTCAACCACAACCAATGGAGGGGCTTCATGAGAGTGGTCCTCCACCGTTTCTCACAAAGACATATGACATAGTTAATGATGGTTCCACTGATGACATAGTTTCATGGAGCAGAGGAAACAACAGTTTCATTGTATGGGATCCTCAAGCATTTTCCATCACCCTTCTCCCCAAATACTTCAAGCACAACAATTTCTCCAGCTTTGTCAGACAACTTAACACCTATGGGTTTAGAAAGGTAGATCCAGATAAGTGGGAGTTTGCTAATGAAGGGTTTCTTAAAGGACAAAGGCATCTGTTAAAGAATATAAGGAGGAGGAAA…
>CrHsf11	ATGAATTATACATATCCAGTGAGAGAAGAATACATTGAAGCATCATCATCATCATATGAATCAAGTGGTGAATATGTAGCAACGATTCCTCCACCTCAGCCAATGGAGAGACTTCATGACACAGGACCCCCACCGTTCCTGACCAAAACTTTTGATGTGGTGGATGACCCAACTACAAACCATGTAGTTTCGTGGAGCAAAGATGGTACCAGTTTTGTGGTTTGGGATCCACATGCTTTCTCTACAGTTTTACTTCCCAGATATTTCAAGCATAACAACTTCTCAAGCTTTGTCAGGCAACTAAACACTTATGGTTTTAGAAAAATTGATCCGGAGAGATGGGAGTTTGCAAATGAAGGATTCAGGAGAGGGCACAGGCAGCTATTGAGGAACATAAGG…
>CrHsf12	ATGGAGGGAGAAAGTGATAAAGGGTTGTTATTGGAGTATGTAAGGAAATCCACAACTCCACCACCCTTCTTATTGAAGACCTATATATTGGTTGAGGATCCAACCACCAATGATGTTGTGTCATGGAATGAAGATGGAACAACATTTGTGGTGTTGCAACCTGTGGAGTTTGCACGTGATCTACTCCCAACACTCTTCAAGCATAGCAACTTCTCTAGCTTTGTTCGGCAGCTGAATACCTATGGCTTTCGTAAAGTTGCAACAAGTAGATGGGAGTTTTGCAACGACCGGTTTAGGAAGGGTGAGAAGGAACTTCTATGTGACATTCGGCGTAGAAAAACTTGGGCCTGCAAGCAACAACCAACTATTGCACCAATTCAAGCCACAACTCAAAATTCA…
>CrHsf13	ATGGGAAGGAAGTTTCGCGAGAAAAAAGAGAACTACCACCATAGAAAACACTTTGCGCGCCATTCCCACTCCATGGCTCCGCCGGTGGAACACAACGGCGACTCATCGGCCGGTGAGTCACAAAGATCCATTCCGACGCCGTTTCTCACCAAAACCTACCATCTTGTCGATGATCACTCCATCGACGACGTGATTTCGTGGAACGATGCTGGATCATCATTCATCGTCTGGAACCCTACCGTTTTCGCCCGCGATTTGCTTCCCAAGTATTTTAAACACAACAATTTCTCCAGCTTCGTTCGTCAACTCAACACTTACGGGTTCAGAAAAGTCGTGCCTGATCGGTGGGAATTCTCAAACGACTGTTTTATAAGAGGCGAGAAACGGCTTCTTTGTGAA…
>CrHsf14	ATGAATCCTCATGGTGGAGTCAAGGAGGAGTTTCTTGGAGGAGAAAGTTCGAGGTTTTATGGCGGTTATGAAACACAATCAATGGTGGTTGTTCCTCAACCAATTGAGGGACTTAATGAAACTGGTCCTCCACCATTCCTCACAAAAACTTATGACATCGTTGATGACCCTTCCACAAATCATATAATTTCATGGAGCACTGGGAATAACAGTTTTGTTGTGTGGGATCCCCAGGCCTTCTCTATAACCCTTCTTCCCAGATTCTTCAAACACAACAATTTCTCCAGTTTTGTAAGACAACTCAACACCTATGGGTTCAAAAAGGTGGATCCAGATAGGTGGGAGTTTGCTAATGAGATGTTTATTAGAGGACAAAGAATTCTATTGAAGAACATTAGA…
>CrHsf15	ATGGAAGGATCAGGTCCGGCACCGTTCCTACTGAAGACGTACGAGATGGTGGATGATTCATCGACGGAGGAGATTGTTTCGTGGAGCTCAACCAACAACACCTTCATCGTTTGGAACCCCGCTGACTTCTCTCGTCTTCTTCTTCCCACCTATTTCAAGCACAACAATTTCTCCAGCTTCATCCGTCAGCTTAATACCTATGGATTTCGAAAAGTACATCCTGAGCGATGGGAATTTGGCAATGAAGATTTTGTGAAAGATCAAAAGCATCGTCTTAAGAATATTCACCGAAGGAAACCTATTCACAGTCACAGTCACCCTCCTGGTTCTGCAATGGATCCGGAGAGATCGGCATTTGAGGAAGAAATAGAGAATCTTTCACACGAAAAAACCACTATT…
>CrHsf16	ATGTCGCAGCGATCGACACCAGCGCCGTTTTTGACGAAGACATATCAATTGGTGGAGGATCCTGCCACAGACGACGTGATTTCGTGGAGCACAAGTGGCAACACTTTTGTCGTTTGGAAGCATGCCGATTTCGCCAAAGATTTGCTTCCCAAATACTTCAAGCACAACAACTTCTCCAGCTTCGTTCGCCAGCTCAACACATATGGATTCCGAAAGATCGTCCCTGACAAATGGGAATTTGCCAACGAGAATTTCAAGCGAGGACAGAAGGAGCTTCTCGCAGAAATCAAACGGCGGAAGACGGTGTCCCAGTCGCCGGCAGCCGAGAAAACAGTCGGCTGCGGCGGCGGCAACAACTCGTCGTTGAACTCCGGCGGCGACGACATGGGATCGACGTCG…
>CrHsf17	ATGGGAGAAGAACAAGTAAGAGTGAAAGCAGAGTTACTGGATGACAACGCCCGTTCCAATTCTGAACTCACCGAAGAAGCAACGGTTCACGTCAAAGAAGAGGTGCTCGATGACGCCGCCGTTAACGGTTCTTCCTCGTCATCCTCGTCCATCCAGTTGCCCAAACCGATGGAAGGGTTGCACGAGATGGGGCCACCACCGTTCCTTAAGAAGACCTTCGAAATGGTGGAGGATACTGACACCGACCCCATTGTGTCTTGGAGCCAAACTCGCGATACTTTCATCGTTTGGGACTCTCACGAATTCTCCAAAACCCTTCTCCCCAAGTACTTCAAGCACAGCAATTTCTCCAGCTTCGTTCGCCAGCTCAACACATACGGCTTCAGGAAGGTAGATTCA…
>CrHsf18	ATGGCTTTCACACTAGACAGGTGTGAAGATAGTGTGGTGTTCACTATGGAGTCTCAGAAGTCAGTGCCTGCTCCCTTCCTGACAAAGACATACCAGCTTGTTGATGACCCTCACACTGACCACATTGTGTCTTGGGGTGATGATGAAACCACATTTGTTGTGTGGAGGCCTCCTGAGTTTGCTAGAGATCTTCTTCCAAACTATTTCAAGCACAACAACTTCTCAAGCTTTGTTAGACAGCTAAATACCTATGGCTTCAAGAAGGTTGTTGCTGATAGGTGGGAGTTTGCAAATGAATACTTCAGAAAAGGAGCTAAGCACCTTTTATGTGAAATCCACAGGAGAAAAACCCCTCACCACTATCAACAACACTACCATGACCAACCAACTCAGCTTTTT…
>CrHsf19	ATGGAGGGAATTAAAGTGAAAGAGGAAGAAACAGTGACATGTGCAACTGGGTCATCATCATCATCATCAAGTTTTTTCTCACAACCCATGGAAGGGTTGCATGAAGTGGGTCCCCCTCCGTTTCTTACCAAGACTTTTGAAATGGTGGAAGATCCATCCACCGACTCTATTGTTTCATGGAGCACAACTCGCAATAGTTTTGCTGTGTGGGACTCTCACAACTTCTCCTCAAACATTCTTCCTCGTTGCTTTAAACATAGCAATTTCTCCAGCTTCATTCGCCAGCTCAACACTTATGGATTTAGGAAAGTTGATCGTGATAAATTAGAATTTGCAAACGAAGGGTTTTTAGCAGGACAAAGGCACTTATTGAAGACTATTAACAGAAGAAGAAATGTG…
>CrHsf20	ATGGCTCTTGTGGTAGACAACTGCGAAAGCATTTTGCTTTCTCTGGACACACACAAATCGGTCCCTGCACCCTTCCTCACCAAAACATACCAACTCGTCGATGACCCCTCCACCAACCACATAGTGTCTTGGGGTGAAGACCACACCACCTTCGTCGTTTGGCGTCCCCCTGAGTTTGCTCGTGACCTTCTTCCTAACTACTTCAAACATAACAACTTCTCCAGCTTCGTTCGCCAACTCAACACCTATGGTTTCAGAAAGATCGTGCCTGATAGATGGGAATTTGCGAACGAGTTCTTCAAGAAAGGAGAGAAACACTTGCTGTGCGAGATCCACAGAAGAAAAACCCCTCACCACCACCACCACCATCATCATCATCATCAACAGGTGCCGTCGCAT…
>CrHsf21	ATGGCTCCGCCGCCGCCGGTGGAACACAACGGCGACTCCTCCGCCTCCGCAGCAGAGTCTCAGCGATCTATTCCGACGCCGTTTCTCACCAAAACCTTCCAACTCGTCGATGACCAATCCATAGACGACGTTATTTCATGGAACGAAGACGGATCCACCTTCATCGTTTGGAATCCTACCGTCTTTGCCAGAGACTTGCTCCCTAAATATTTTAAACACAACAATTTCTCCAGTTTCGTTCGCCAACTCAATACTTACGGATTTAGAAAAGTTGTACCTGATCGATGGGAATTCTCGAACGAGTATTTCCGCAGAGGCGAGAAACGGCTTCTGTGCGAAATTCAACGGCGGAAGATCTCGTCTCCGGCGCCGTCACCGACGGCGGCACCTGTGGCAGCC…
>CrHsf22	CCTCTCTCTCTCTCACACAGACACACACACTCACTGTCACACACACACACACACACAAATTCGACACACACGTTCGCAGTTCCCACACACCATCCCTCTCTTCTTTTTCTTAATGGGATGGAGCTCCACCATAACAACACCGCCACCAACAACAACACTAACAACAGCAACAACAACAACGTGATCGCACCGTTCGTTATAAAAACTTACCACATGGTTAACGATCCTTCCACCGATAAACTCATAACGTGGGGCCCAGCCAATAACAGTTTCATCGTTTTCGACCCTCTCCATTTCTCACACTCTCTTCTTCCTGCCTTCTTCAAGCACAACAACTTCTCCAGCTTCGTTCGCCAGCTTAACACCTACGGTTTCAGAAAGGTGGATCCGGATCGGTGG…
>CrHsf23	ATGGAGGGAGCATCGTGGAATACTGTTAGTGTTGCACCGTTTCTGAGCAAGACCTTCGACATGGTCGATGACCCCTCCACCGACTCCGTCGTTTCTTGGGGTCACAACAACAACACCTTCGTCGTCTGGAATGTTCCCCAATTCGCCACTCATATCCTCCCTAAACATTTTAAGCACAACAACTTCTCCAGCTTCGTTCGCCAGCTTAATACTTATGGTTTTAGAAAGGTTGACCCGGATCGATGGGAATTTGCAAATGAAGGGTTTTTAAAGGGTAAAAAACAACTTTTAAAAACTATCAGTAGGCGGAAATCTGCTCATGTGAATGGTAGTCAACAACCGGCTCAAGTGCATAACTCACCTGTGAGGGCATGTGTTGAAGTTGGGAAATTTGGGCTT…
>CrHsf24	ATGGCGCCATTACCGGCGGAGCAAACCGGTGAATCAGCGCCATTAGAGTCGCAGAGATCCATTCCTACGCCGTTTTTGACGAAGACATACCAGTTGGTAGATGATCCCTCTGCAGATGACCTAATTTCATGGAATGAAGATGGCACGAGCTTCATCGTTTGGCGACCCGCTGAATTCGCTCGAGATTTGCTTCCAAAGTACTTCAAACACAACAACTTCTCCAGCTTCGTCCGCCAGCTTAATACCTATGGATTTCGGAAGGTTGTCCCTGACCGCTGGGAATTCGCGAACGACTGTTTCCGGCGAGGTGAGAGAGGTCTCCTTCGAGACATACAGCGCCGCAAAATATTGCCGGTGGCTCCAACGACAGCGGCAGCAGCAGTGACGGCCAACACGGTA…
>CrHsf25	ATGTCGCAACGGTCGGTGCCGGCACCGTTCTTGACTAAGACGTATCAGTTGGTGGACGATCCGGGAACGGACGAGGTGATATCATGGAGTGAGAGTGGCAATACTTTTGTGGTGTGGAAACATGCGGATTTTGCAAAGGATTTGCTTCCCAACTATTTTAAGCACAACAATTTCTCCAGCTTTGTTCGCCAGCTTAACACCTATGGATTCCGAAAGACCGTGCCTGACAAATGGGAATTCGCGAACGAACATTTTAAACAAGGACAGAAGGAACTCCTCTCTAAGATCAGACGTCGCAAGACGGTGTCCCAACCGTCGTCACAGCCACCGGAAGCCGGAAAATCCGGCGGTGACGGTAATTCTCCGTCAAACTCCGGCGGCGATGACGTGGGATCCACC…
>CrHsf26	ATGGAGGGTGGCGGCGGCGGGTCCACCACCCCGGCGGCGCCGATTCCGAACGCAAACGCGCCGCCGCCGTTTCTGAGCAAGACGTACGACATGGTGGATGACCCGGCGACGGACGCAGTCGTGTCTTGGAGCGGAACCAACAACAGCTTCGTGGTGTGGGACCCACCCGAATTCGCCAGAGACCTTTTGCCTAAATACTTCAAACATAACAACTTCTCCAGCTTCGTTAGACAGTTGAACACTTATGGTTTCAGGAAGGTCGATCCAGATCGCTGGGAATTTGCAAATGAGGGTTTTTTGAGGGGCCAAAAGCACTTGCTTAGGAATATAACTCGGCGAAAACCGGCCCATGGTCATAATCATCAACCGGTTCAGCAACCACATGGGCAGAGTTCGTCA…
>CrHsf27	ATGGCATTCTCCCTAGACAGGTGTGAGGAGAATATGGTGTTCACTTTTGAGTCTCAGAAGTCAGTGCCAGCACCCTTCCTGACAAAGACATATCAGCTTGTTGATGACCCAAGAACTGACCACATTGTGTCTTGGGGTGAAGATGAATCCACATTTGTTGTGTGGAGACCCCCTGAGTTTGCCAGAGACCTTCTTCCAAACTATTTCAAACATAACAATTTCTCAAGCTTTGTGAGGCAACTCAACACCTATGGTTTCAAGAAGGTAGTGGCTGATAGGTGGGAGTTTGCAAATGAGTACTTTAGAAAAGGAGCTAAGCATCTCTTATGTGAAATCCACAGAAGAAGAACACCACAACAACATAACCAACTCTTCAATGATCAACCACAATCACAGATT…
>CrHsf28	ATGGAGGAAGCTCAGAACAGTTCTGGTTCCCTGCCTCCTTTCCTCTCCAAGACTTATGAGATGGTGGATGATCCTTCCACCAATTCCATTGTTTCATGGAGTGCCACGAATAAGAGTTTCATTGTTTGGAACCCACCAGAATTTTCAAGGGATTTGTTGCCCAGATTTTTTAAGCACAATAACTTCTCAAGTTTTATCAGACAGCTAAACACTTATGGGTTTAGGAAGATTGACCCTGAACAATGGGAATTTGCAAATGATGATTTTGTAAGAGGTCAACCACACCTTCTGAAGAATATCCATAGGCGCAAACCTGTTCATAGTCATTCTTTGCAGAATGTCCAAAGTCAAGGGACCGTTCCGCTAACAGAATCAGAACGGCAGAATTTGAAAGATGAG…

## Sheet: gDNA sequences
The sequence information of the CrHsf family
>CrHsf1	ATGGTAAAATCGAACGATAATGGTTCTGGTTCGGGTTTGGGTTCGGTGCCTCCTTTCTTGAACAAATGTTACGAGATGGTTGAGGACCACAACTCCGACTCCATAATCCGTTGGAACGACGGCGGTGACAGTTTTATCATCTCCGACATCACTCAATTCTCCGTCGCACTCCTTCCCTCATATTTCAAGCACAACAATTTCTCCAGCTTCATCAGGCAGCTCAATATCTATGTCCGTCTCCCTCTTATCCTCTTTCTTTTCTTTATCGCTTAATTCCATTTTGTTCTCTGTGACGCTTTTGGTGTGGGGTTTCTTAATTGTTTGTCTTCACCATCAAAATAATAAATAAATGGTTGTTGTTATTATAATTGTGTTTTCAATATTCTTATACAGTTCCTT…
>CrHsf2	ATGGATGAAGCGCAGGGTAGTTCAAGTTCTCTGCCTCCATTTCTGGCAAAGACTTATGAGATGGTGGATGATCCTTCCACGGATTCGATTGTTTCATGGAGTGTCACTAACAAAAGTTTTATTGTATGGAATCCCCCAGACTTTGCAAGAGATTTGCTGCCTAGATTCTTTAAGCACAATAACTTCTCAAGTTTCATCAGGCAGCTCAACACATATGTAAGCAAATTTGATCTTGGTGTTGTTGATGTAAATGCTTGTTTTGTATTTATTTCCCCATTCTGCTTGAAAATCTGAGTCTTAGTCTCTCAATTTGAGCAGGGATTTAAAAAGATTGACCCAGAACAATGGGAATTTGCCAATGATGATTTTGTAAGAGGGCAGCCTCATCTTATGAAGAAC…
>CrHsf3	ATGGACGGAGTGCCGCCTTCCGCCGCCGGCGGAGCAGGAGGTCCGGCGCCGTTCCTAATGAAGACCTATGACATGGTAGACGATTCCTCCACCGACGACATCGTTTCTTGGAGTTCGTCTAACTGCAGCTTCGTCGTTTGGAACCCGCCTGAGTTCGCTCGCCTTCTTCTCCCAACCTATTTCAAGCACAACAACTTCTCCAGCTTCATCCGCCAGCTTAATACCTACGTGAGTTACTTTGATTCGTGCCTTCGCTCCTGTTTCCTGCACTTGCTTTCAGTTGATTGTAATTCATTCTGATTACTGGCTCTAATTTGCCTGTTTTATATGTTTGCGTAATTTGATTGTGTCTTCGCAAAAGTAATTATCCCCGAATTTTACTATTTTTTAATCATTTTT…
>CrHsf4	ATGGACGGAGCGAGCAGCGGTGGCGGAGAAGTGACGACGCCGGCGCCGGCGCCGGCGCCGATTCCGAACGCGAACGCGCCACCGCCGTTCCTGAGCAAAACGTACGAGATGGTGGACGACCCTTCTACGGACTCGATCGTGTCTTGGAGCCCAACGAACAACAGCTTCGTGGTTTGGAACCCTCCCGAGTTCGCGAGAGACCTCTTGCCCAAGCACTTCAAACACAATAACTTCTCCAGCTTCGTTCGCCAGTTAAACACCTACGTACGCGTGCTAACTCCTTCTTTCTCTCCTTTGTTCATGATTTTATGGTTCGTAATTATAACTGAATTAAGCGGAGTTGTCAGCTCCACTCATTTCTGCAATTTTAACTAATTACGACAAACTGTTTCTTTCTGG…
>CrHsf5	ATGGGTGATAATGTGTTGGAGCTCAACCTTGGTTTAGGTAACTTTCCTAGTCATGTAGGGCAGTCACCAAGGCCAAGGTGCCCCGCACCCTTCTTATTGAAGACTTATGATTTGTTGGAAGAAGGTGAAGCTGAAGATGGCAGTTCCAAAATTGTGTCATGGAATTCACAAGGAACTGCTTTTGTTGTGTGGTCTCCAGCTGAGTTCTCTGAGTTCACCTTGCCTAGATATTTCAAGCATAATAACTTCTCTAGCTTCATTCGCCAATTGAATACATATGTAAGTAGTTTTGATTTCCCTCTCCATTCTAAAATCCATGTTCTTATTCTCATGTCTTTACAATGTTTAGGATTAGGGTTTTAAATCTTATTTACAATTGTGCTGGACAAATGCTAGTTG…
>CrHsf6	ATGGCTCTTCTTCTAGACAACTGCGAAGGGATCTTATTGTCTTTGGAGTCACACAAATCGGTGCCAGCTCCATTCCTTACAAAGACATATCAACTGGTAGATGATCCCACCACAGACCATATAGTCTCTTGGGGTGAAGACGACACCACCTTCGTCGTTTGGCGTCCCCCTGAGTTCGCCAGAGACCTTCTTCCCAATTACTTCAAACACAACAACTTCTCCAGCTTCGTTCGCCAGCTCAACACCTATGTACGTACATACATACATACACACATTCTCACTATTATTTTTATTTATTATTTTTCCATCACTCTTGTTCTAACTTTGTTTAATTAATCACAATCACATGAACTAGGGTTTCAGAAAGATTGTGCCGGATAGATGGGAGTTCGCTAACGA…
>CrHsf7	ATGAAGGGAGTTACAGTGAAAGTGGAAGAGACAGTGGCATATGGTGGTGGTGCAGCAGGTCATGCTTCTGCTTCAAGCTCTTCTTATTCTTCCTCTTCAACTTCTTCAACCTTCTCTCCCCAACCTATGGAAGGTTTGCACGAGGTGGGTCCTCCTCCATTCCTCACCAAAACCTTCGAAGTCGTCGAAGACCCATCCACCGACTCCATTGTATCGTGGAGCAAAGCACGCAACAGCTTCGTCGTTTGGGATTCTCATCAATTCTCTACCACCATCTTACCTCGTTACTTCAAACACTGCAATTTCTCCAGCTTCGTTCGTCAACTTAATACCTATGTAAGTTTATATTCCTTTTTCTTGCACTTATTTCATGCCTTGCATGTTACGTGTTTGATTTAA…
>CrHsf8	ATGGAAGGAGGAATTAGTGAGAAGGGGTTGTTGGAATGTGGAAGGAAGTGTAGTCCACCACCGTTTTTGTTGAAGACATATATGTTAGTAGAGGATCCGGCAACCGACGACGTCGTTTCATGGAATGCGGAAGGGACGGCGTTTGTGGTGTGGCAGCCGGCGGAGTTTGCTCGTGATCTCCTCCCAACACTCTTCAAGCACAGCAATTTTTCCAGCTTTGTCCGTCAGCTCAATACCTATGTATGTACCTCTATAAACTAATACATATGCACTAACCTATAGTTACATCATTTAATTTCCTGCTTAATTTGTTTTCTGCACTTCAATTCGGATCTATTTAATCAATCATAATAACTTATTTATTGTTTAGTTTTGATATTTATTTTCACAACTTTGAGC…
>CrHsf9	ATGAACTATCTTTATCCAGTGAAAGAAGAGTACTTGGAAGAAGCAGCAGCTTCATCATCATCAACGTGTGACATAGGAGGTGGTGATGAAGCAGAAATGGTTCCTCCTCCGAGACCAATGGAGGGGCTTCATGAAGTAGGACCACCACCATTTCTGACCAAGACTTTCGATGCAGTGGAGGACCCCACCACCAGCCACATAGTTTCATGGAGCAGAGGCGGTGCCAGCTTTGTGGTTTGGGATCCACACGCTTTCTCCAGAGACCTTCTTCCTAGATACTTCAAGCACAACAATTTCTCTAGCTTTGTCAGGCAACTAAACACTTACGTAAGTCTCTTCATTTGTTTTCCCCTTACCTTCCTATTTTGTGGGATTAATCTTTTACTTCCAAAGATAAGT…
>CrHsf10	ATGAATTCTAATGTGATTACTGTGAAGGAGGAGTTTCCTGGAGAAGAAGAAGGAGAAAGTTATGTGGTTGCTCAACAACCTCAACCACAACCAATGGAGGGGCTTCATGAGAGTGGTCCTCCACCGTTTCTCACAAAGACATATGACATAGTTAATGATGGTTCCACTGATGACATAGTTTCATGGAGCAGAGGAAACAACAGTTTCATTGTATGGGATCCTCAAGCATTTTCCATCACCCTTCTCCCCAAATACTTCAAGCACAACAATTTCTCCAGCTTTGTCAGACAACTTAACACCTATGTAAGTATATATATTATATTGCTCTCTCTCTCTCTCTCTCTCTCTCTCTCTCTCTCTCTCTCTCTCTCTCTCTCTCTCTCTCTCTCTCTCTCTCTC…
>CrHsf11	ATGAATTATACATATCCAGTGAGAGAAGAATACATTGAAGCATCATCATCATCATATGAATCAAGTGGTGAATATGTAGCAACGATTCCTCCACCTCAGCCAATGGAGAGACTTCATGACACAGGACCCCCACCGTTCCTGACCAAAACTTTTGATGTGGTGGATGACCCAACTACAAACCATGTAGTTTCGTGGAGCAAAGATGGTACCAGTTTTGTGGTTTGGGATCCACATGCTTTCTCTACAGTTTTACTTCCCAGATATTTCAAGCATAACAACTTCTCAAGCTTTGTCAGGCAACTAAACACTTATGTATGTATTATCTAACCACAATCTCTTTAATAATTCATTTCTTCGAAATTTTAATGCCTTTGTGTTTTAAGATTTTGCTTGTAAAGA…
>CrHsf12	ATGGAGGGAGAAAGTGATAAAGGGTTGTTATTGGAGTATGTAAGGAAATCCACAACTCCACCACCCTTCTTATTGAAGACCTATATATTGGTTGAGGATCCAACCACCAATGATGTTGTGTCATGGAATGAAGATGGAACAACATTTGTGGTGTTGCAACCTGTGGAGTTTGCACGTGATCTACTCCCAACACTCTTCAAGCATAGCAACTTCTCTAGCTTTGTTCGGCAGCTGAATACCTATGTACGTATATTTTAATTTATGAATACATATTATAGCATATATTTTTATGGTATAATATTGAGATCATTTCGACCTTAATTTTTTCACTTTAGTAACATAATTAAGGGAATAACACATCATTAAAACTTACAGATAATAGTAGGATGAATAGTATAG…
>CrHsf13	ATGGGAAGGAAGTTTCGCGAGAAAAAAGAGGTGAGTAACGTAATAGCTCCTTCTTCTCTTTTCCTTCAATTTCTTTTGCATCCCCCTGTTCTTTCTCATTTCATTCTCTTATATTTCCATTTCCACGTGAACCTTCTAGAACTACCACCATAGAAAACACTTTGCGCGCCATTCCCACTCCATGGCTCCGCCGGTGGAACACAACGGCGACTCATCGGCCGGTGAGTCACAAAGATCCATTCCGACGCCGTTTCTCACCAAAACCTACCATCTTGTCGATGATCACTCCATCGACGACGTGATTTCGTGGAACGATGCTGGATCATCATTCATCGTCTGGAACCCTACCGTTTTCGCCCGCGATTTGCTTCCCAAGTATTTTAAACACAACAATTTCTC…
>CrHsf14	ATGAATCCTCATGGTGGAGTCAAGGAGGAGTTTCTTGGAGGAGAAAGTTCGAGGTTTTATGGCGGTTATGAAACACAATCAATGGTGGTTGTTCCTCAACCAATTGAGGGACTTAATGAAACTGGTCCTCCACCATTCCTCACAAAAACTTATGACATCGTTGATGACCCTTCCACAAATCATATAATTTCATGGAGCACTGGGAATAACAGTTTTGTTGTGTGGGATCCCCAGGCCTTCTCTATAACCCTTCTTCCCAGATTCTTCAAACACAACAATTTCTCCAGTTTTGTAAGACAACTCAACACCTATGTAAGTAAATTACTCGTCTTTCTACTTACCAATTTTGTATCGAGTTATATATATACATATAGATATAGATATTATTCTCCTAGACTC…
>CrHsf15	ATGGAAGGATCAGGTCCGGCACCGTTCCTACTGAAGACGTACGAGATGGTGGATGATTCATCGACGGAGGAGATTGTTTCGTGGAGCTCAACCAACAACACCTTCATCGTTTGGAACCCCGCTGACTTCTCTCGTCTTCTTCTTCCCACCTATTTCAAGCACAACAATTTCTCCAGCTTCATCCGTCAGCTTAATACCTATGTATGTTTCCATTTCCTTTCATATTTACTTCCTCTTCCTACTCCTATATATTCATTTTTAATTCATTTTACATTTCTGCAACTTTCTTATTTATTACTCTCCAAACACAATATAAATGCTTTGTACGGATACTACTATTCACTCTGCCAGGTTTGTTTTTATGGAGGGCCGCTCATTTTGAAATTTAAGGCCCGGCCC…
>CrHsf16	ATGTCGCAGCGATCGACACCAGCGCCGTTTTTGACGAAGACATATCAATTGGTGGAGGATCCTGCCACAGACGACGTGATTTCGTGGAGCACAAGTGGCAACACTTTTGTCGTTTGGAAGCATGCCGATTTCGCCAAAGATTTGCTTCCCAAATACTTCAAGCACAACAACTTCTCCAGCTTCGTTCGCCAGCTCAACACATATGTAAGACCCTCCTCTGTTTCCTTATCTTCAATTCAATCACTTCACTTCCCTTCACGTGTTTTCTCGTTTATATTCTGTTTCTGTCGTTTACATATAACTAGTTCGTATAGGCATAATCAGATTAATGAACTTAAGAGCATCTTAATTTCTAGTCCACCGTGTACACAAATCTCCGCTTTGATGTTAATATAGCAT…
>CrHsf17	ATGGGAGAAGAACAAGTAAGAGTGAAAGCAGAGTTACTGGATGACAACGCCCGTTCCAATTCTGAACTCACCGAAGAAGCAACGGTTCACGTCAAAGAAGAGGTGCTCGATGACGCCGCCGTTAACGGTTCTTCCTCGTCATCCTCGTCCATCCAGTTGCCCAAACCGATGGAAGGGTTGCACGAGATGGGGCCACCACCGTTCCTTAAGAAGACCTTCGAAATGGTGGAGGATACTGACACCGACCCCATTGTGTCTTGGAGCCAAACTCGCGATACTTTCATCGTTTGGGACTCTCACGAATTCTCCAAAACCCTTCTCCCCAAGTACTTCAAGCACAGCAATTTCTCCAGCTTCGTTCGCCAGCTCAACACATACGTCAGTAAAAATTCCCACAAC…
>CrHsf18	ATGGCTTTCACACTAGACAGGTGTGAAGATAGTGTGGTGTTCACTATGGAGTCTCAGAAGTCAGTGCCTGCTCCCTTCCTGACAAAGACATACCAGCTTGTTGATGACCCTCACACTGACCACATTGTGTCTTGGGGTGATGATGAAACCACATTTGTTGTGTGGAGGCCTCCTGAGTTTGCTAGAGATCTTCTTCCAAACTATTTCAAGCACAACAACTTCTCAAGCTTTGTTAGACAGCTAAATACCTATGTGAGAATACATATCTTCTATATAACTTCTTTCTTCTCCATTCATGATTGTTTTGGTACTACCTTCAGAGGGAAAAGATAAAATGCTAAATATTTCTTGTAACACCAATCTTCACCTCAATACTAATTCAGAAGAATTTGGAAATGG…
>CrHsf19	ATGGAGGGAATTAAAGTGAAAGAGGAAGAAACAGTGACATGTGCAACTGGGTCATCATCATCATCATCAAGTTTTTTCTCACAACCCATGGAAGGGTTGCATGAAGTGGGTCCCCCTCCGTTTCTTACCAAGACTTTTGAAATGGTGGAAGATCCATCCACCGACTCTATTGTTTCATGGAGCACAACTCGCAATAGTTTTGCTGTGTGGGACTCTCACAACTTCTCCTCAAACATTCTTCCTCGTTGCTTTAAACATAGCAATTTCTCCAGCTTCATTCGCCAGCTCAACACTTATGTAAGTACTCAATTTTGTTTGTTACTGAATTCCCCGTTTCATGTTTTTATGGATATGCTCATGTCATATCATCACTTTATGGCTTTTTATTTGTATAATATT…
>CrHsf20	ATGGCTCTTGTGGTAGACAACTGCGAAAGCATTTTGCTTTCTCTGGACACACACAAATCGGTCCCTGCACCCTTCCTCACCAAAACATACCAACTCGTCGATGACCCCTCCACCAACCACATAGTGTCTTGGGGTGAAGACCACACCACCTTCGTCGTTTGGCGTCCCCCTGAGTTTGCTCGTGACCTTCTTCCTAACTACTTCAAACATAACAACTTCTCCAGCTTCGTTCGCCAACTCAACACCTATGTAACTAATCATTAATTTACCTCTTAATTTCTTAATTAATTAATTAATTAACTAACTAACTAATCTCTCATTCTTCTTACCTAACTCAATCCTTTTTCATTTTTAATTAGGGTTTCAGAAAGATCGTGCCTGATAGATGGGAATTTGCGA…
>CrHsf21	ATGGCTCCGCCGCCGCCGGTGGAACACAACGGCGACTCCTCCGCCTCCGCAGCAGAGTCTCAGCGATCTATTCCGACGCCGTTTCTCACCAAAACCTTCCAACTCGTCGATGACCAATCCATAGACGACGTTATTTCATGGAACGAAGACGGATCCACCTTCATCGTTTGGAATCCTACCGTCTTTGCCAGAGACTTGCTCCCTAAATATTTTAAACACAACAATTTCTCCAGTTTCGTTCGCCAACTCAATACTTACGTAATTCAACTCTCTCAATCGTCAGCCTTTTTTTTTGTTTTCCTCTGATTTTTATTTTTATTTTATTTTTTAAATTTGCTGTCGTTTTTGCTTGATTTGCAGGGATTTAGAAAAGTTGTACCTGATCGATGGGAATTCTCG…
>CrHsf22	CCTCTCTCTCTCTCACACAGACACACACACTCACTGTCACACACACACACACACACAAATTCGACACACACGTTCGCAGTTCCCACACACCATCCCTCTCTTCTTTTTCTTAATGGGATGGAGCTCCACCATAACAACACCGCCACCAACAACAACACTAACAACAGCAACAACAACAACGTGATCGCACCGTTCGTTATAAAAACTTACCACATGGTTAACGATCCTTCCACCGATAAACTCATAACGTGGGGCCCAGCCAATAACAGTTTCATCGTTTTCGACCCTCTCCATTTCTCACACTCTCTTCTTCCTGCCTTCTTCAAGCACAACAACTTCTCCAGCTTCGTTCGCCAGCTTAACACCTACGTTAGTATATATATAAATAATAATAATAAT…
>CrHsf23	ATGGAGGGAGCATCGTGGAATACTGTTAGTGTTGCACCGTTTCTGAGCAAGACCTTCGACATGGTCGATGACCCCTCCACCGACTCCGTCGTTTCTTGGGGTCACAACAACAACACCTTCGTCGTCTGGAATGTTCCCCAATTCGCCACTCATATCCTCCCTAAACATTTTAAGCACAACAACTTCTCCAGCTTCGTTCGCCAGCTTAATACTTATGTGTGTGCTGTTCCAATCATCTCTTTTCCCTCATTATTTTATTATTCGTTCATTATTTTATTATTCTTATCCTTTATTTTTTATTTCCTGTTTTTCGGGTGAAAGGATTCGTGATTTCATATTGTTAGATTTAATATTTATGGGAAACCCTTGTTCTTGTTGTTTGGTTTCGTTGGATGTTCA…
>CrHsf24	ATGGCGCCATTACCGGCGGAGCAAACCGGTGAATCAGCGCCATTAGAGTCGCAGAGATCCATTCCTACGCCGTTTTTGACGAAGACATACCAGTTGGTAGATGATCCCTCTGCAGATGACCTAATTTCATGGAATGAAGATGGCACGAGCTTCATCGTTTGGCGACCCGCTGAATTCGCTCGAGATTTGCTTCCAAAGTACTTCAAACACAACAACTTCTCCAGCTTCGTCCGCCAGCTTAATACCTATGTAACCGTCCTGATTTCTTTTTTATTATTATTTTAGTTTTGGATTTTGTCAGCAGCCAAACGGATTACCGTGTTTTTTGTTCGCAGGGATTTCGGAAGGTTGTCCCTGACCGCTGGGAATTCGCGAACGACTGTTTCCGGCGAGGTGAGA…
>CrHsf25	ATGTCGCAACGGTCGGTGCCGGCACCGTTCTTGACTAAGACGTATCAGTTGGTGGACGATCCGGGAACGGACGAGGTGATATCATGGAGTGAGAGTGGCAATACTTTTGTGGTGTGGAAACATGCGGATTTTGCAAAGGATTTGCTTCCCAACTATTTTAAGCACAACAATTTCTCCAGCTTTGTTCGCCAGCTTAACACCTATGTATGTTCTCTTCTCCTTTAACATTTACTTGCTTCATTTGGGTGATTTTTTCCATGCTGGTCTGTAACATAGTTTCTTATGCCCTCTGTTTTTTTATTTTATTTTATGATGTTTAGTTTTTAGAATATTAAAAGTTATTATGAGAAAATAGTTTTTTTATTGAAATATCTTTATTAAAAAGTTCAAGTATAATTA…
>CrHsf26	ATGGAGGGTGGCGGCGGCGGGTCCACCACCCCGGCGGCGCCGATTCCGAACGCAAACGCGCCGCCGCCGTTTCTGAGCAAGACGTACGACATGGTGGATGACCCGGCGACGGACGCAGTCGTGTCTTGGAGCGGAACCAACAACAGCTTCGTGGTGTGGGACCCACCCGAATTCGCCAGAGACCTTTTGCCTAAATACTTCAAACATAACAACTTCTCCAGCTTCGTTAGACAGTTGAACACTTATGTATGTTATCTTCTTCCTCTTCATTCCACCTGTGTTACTCATTCATTACTCCTTGGATCACTAAACACCGCGCTTTTCTATATATATATATATATATATATATATATATATATATATATTTTGCACCGCTGGACATTTAATTGGAAGTGATTA…
>CrHsf27	ATGGCATTCTCCCTAGACAGGTGTGAGGAGAATATGGTGTTCACTTTTGAGTCTCAGAAGTCAGTGCCAGCACCCTTCCTGACAAAGACATATCAGCTTGTTGATGACCCAAGAACTGACCACATTGTGTCTTGGGGTGAAGATGAATCCACATTTGTTGTGTGGAGACCCCCTGAGTTTGCCAGAGACCTTCTTCCAAACTATTTCAAACATAACAATTTCTCAAGCTTTGTGAGGCAACTCAACACCTATGTATGAATCCTTATCTCTTATCTTCTTATATATACTTCTTCACTCTCTACTCTTCATCTTTGTTTCATTCAGTTAATTTGAAGTTAAAAGATTATGAGATTGTCATTTCCTTAGTATATAAATAGTTTATTTGACTATTTTGAATCA…
>CrHsf28	ATGGAGGAAGCTCAGAACAGTTCTGGTTCCCTGCCTCCTTTCCTCTCCAAGACTTATGAGATGGTGGATGATCCTTCCACCAATTCCATTGTTTCATGGAGTGCCACGAATAAGAGTTTCATTGTTTGGAACCCACCAGAATTTTCAAGGGATTTGTTGCCCAGATTTTTTAAGCACAATAACTTCTCAAGTTTTATCAGACAGCTAAACACTTATGTAAGCAAATTTAACCTTCTTCATGTTTCATGGATCTGATAACTTGTTTTGTTTTTGTTGTTTTTCTTTTTCCTCATAAAGGGTTTGATTGTTTGAACTTTGGCCATGGTTTTGTTTGATCAGGGGTTTAGGAAGATTGACCCTGAACAATGGGAATTTGCAAATGATGATTTTGTAAGAGGT…

## Sheet: Promoter sequences
The sequence information of the CrHsf family
>CrHsf1-Pro	TTTAATTATAGTTTATTGTAAACTATATTTTAAATTTTAATTGTAAAATTTTTTCAAAAAAATATTATAAATTTTCAAAATTACTTACACGTTAAAATAAATTTTTAAAATGTTTTTAAATATATATTTTATTAAAAATATTATAAACTAAAAATTATAATTATGTTATTTATTGTTATAACAAAATTTATTATTTTAATATAATTTATAAATTATTTTATCATTATTTATTTATCTCAAATATTAAATAAGATAATAAAAATATATCATTTTCTTATTTTATAATACATTATCTTATCTTATTTTAATTTATATTTATATAATATTTATATTTTATCTTTATTTATTTTATTCAAACTAACAAATTAAATTTCAATTTTTAACATTGTTTTTTAATCT…
>CrHsf2-Pro	GGACAATGTCATTGTTAACATATTATCGATTTCTATTTATTTCGGATCAACTTTTATCAATGAATTTACATGCTTGATAGTAGTATACTGCTTAAATGCTTTTCTCTTATTTTGAATATGTCTTTATTACCTAAGCGTTAGTGATATTGTTTGATAATTTATTACTGGTAGAAGATATTAATTCGTACTTTAATTTTTCTAAGACTTCATTGGTATTTCTTTGCGTGAGCACATGCTTTACCGCAGGATGTTCATTGGAGAAATTATTTGGGTATAATAATTTCACTAATTAGTATTAAATTTGATCACGGGGAATTACGAACCTTATTACAGTCTCAAATTGCTTGTAGGCAAAAAAAGAGTTCTCAATTCACTTAATTGCTTTTATTTCCATTAAAT…
>CrHsf3-Pro	AGAATTAAAAGTAAGAAAAAATATAAAAATAAAATTATAGAAACTAAAACTAAAATTTTCTATATTTAAAGATATTAAACATATATTTAACCTTTTTTAAAAATTATTTTTCAAAGCTCAAAAACATTAACGAAATTTTCTATATTTTAGAATATTAAACACATATTTAACCTTTTTTAAAATTATTTTAAAAACTTCAAACAAACATGCTCATTGTAAGAATGTCTAATTATATTATTATCTGAGCTGAACTTAAACTTCTGTTTTATGGTAAAAAACATTTCCATCCAATAAAACTTAAAAGGGACTTGCTCATCCGAGTTGAGTAACCTGTTTTAACATATTTGTTTCAAAAATGTATTCAGTAACATGTTTTAATATATTTGTTTCAAAAACGTA…
>CrHsf4-Pro	TTCTCCTTATGACACTTGTTTTCAAGGGATTGTTTGGAGTGTATCAATGGGATGATGAGAGTGAGGAAAAGAAGGATCCTTTGGTGGAGTATTTTGTGAAGGACAAGTAGTGTGTGCTCTAACTAGTTTATGCACAATCTCTTAAAGTGAACAACTTTGACACCGGTGAACCCTCCACCTTTTGATGTTTTATCATGTCTTTTGTAGAAAAATTTTATTTGATTTTATTTTTTTTATATTTTGTATTTCTAATAATAGGTTAGAAACTCTATTATGTTATAATTTATTTTATAAGATTATTCAGAATCTATATTTATTTAATACACTTGTTTATAAGGAATGGTCATTTATTTATCCTTTCTTAATATATTTGTATTTATATATGTGCTTACTTATGGT…
>CrHsf5-Pro	AACACACATTTTTTAAGCATCTTATACTGATTAGTAAATTCAGTAAAAAAAAATAATAACTTAAGTTATTTAACGAAATTTACATAAACATTATAAAATTATAAAATTTACAAATCGAACCTGGCCAGTAAAAAATTGTGATCAAACTTTTTACATAAATATGGTTACAGTTTCTTTTTTTAGGGTTTTTTGGATAGTAAACTTGTCCGCTTTTTAGTACACTAGGATTCCTTTAAAAACTTTTATCAAATAATAATATTATTATTATTATTATTATTATTCATCTAGGACGGTTGTTAGCACTTGATAGATTATCCTATTATTTTATTTGTGTTATACATGTATTCTGCTTTTTGAAGATAGATGAAATATATTAATTCTTTAAAAAAATATTCACTT…
>CrHsf6-Pro	ATAATCTTCAAATAAAATTATCGTATTCTTATATAGTGATTAACATTAGTCTTAATTTTTACAAAATCAACCTAAGCCACTGGACGTGATACTGCGTTAATCTTGCTTTTAATGAAAAAAAAAATACTCACATATCTTATTTAGGATATATTAAATCAAAAGAAGTAGAAAAAAATAAAAAAGTACAATATAATATATAATTTGGTAGAAAAGCTATAAAAAAATATATTAAAATATAAATAGTTTGAATATATGATAATTAAAATTGTTATAGAAGGGAGGTGGAAAAGGTGTAAAAATTGGCGTATTTGTTTGTGGGAACTTTTTGGGGTCAATAATTCAATCACCTGGACACATCAGCAAAAGGAAGCCGAGCTGCGGAAGAGCCAAAGTTGGAGG…
>CrHsf7-Pro	TTTATAAAAAATAATTTTTTTTCATAAACTAAAATTTTGGAACGTAAAATATTTGTTTGAATAACAAAAGAGAGAATAAGAAGGATGAGCCCACTTCGAATCTTCCTCCCAAATGTTGATTTATTTTTTACATTATAGTAGTATCTACTTTTTTGTGGTTATGTTTTTAAATTTGGTATTTTTAATTTTAAAAAAAAATCTACAGTAAGGAGAAAACTAGCAATACAAAGTTGGGTGTTTATATTTTAAATGAAGGAATATGTAGTCTTGCAGTGCTGAAAAAAAAACAAAAAATGGGAAAATTGGGAATGCATTTTTTAAATGATTTTAACTTAAATGTCATTTTTATGTAATGTAAAGACATAAAAAAAACTGAGAAAAATATTATACTGAGACATA…
>CrHsf8-Pro	TTAAACTATAATTATTTTCTACATAAAACAATCTTATTTAATTTGGATAACGTTCACGATATGATGGGATTAAAACTCTTCTAACAAAATTTTTTATCATATACAAAGCTCATACATAGGAAATTATTTAGAAGAATTAAATAGATATTTCCATTTAAATTAATTACCAATTAATTAATTATAAATAATTTAAAATAAGTTTAAATATAACAGGTGGTGATTATTTAAAATATATATATTTATCAAATTTAAGTTAGAGTTAAATAATTAAATATATATTTATTTTAGTTTATATTTATACATTAATTAAAAATTAATTGTCCTAAATGCATTTTTTAATTTAACCAATTAATTTATCGTATCAATTTTGATTAACTTATCCCATAATTTAACCAAATA…
>CrHsf9-Pro	AAGAAAAATAATTGAAACAAATTCATTTTAAAATAAAAATTTACCTTGCACTAAATTTGAGGTAACATTATATTAAATAGAGCATATCTAAATATTGCATATATTTTCTTTATATAATTTTTTTTATGGGTGAGTCATAATTAGAATGAGAGAGCATCATCACATTTTGCTCTAACAAGACATAGGAGATCCTTAACAATCAAGACATAAATATATTTAAATAAAATATATTTTTATTAGTCTTAACCCATCTAAGATCAGATTATACGGATTAACTCATGAACTTAAGTATATATATTCAACTATAATTGTGCATAGCGTTAGAACAACATGAATCTGGTGAAAAGAAAAGTACAACTTAAACATATTACTTGATTTGAAGGTTAGAGCTTGCGATTA…
>CrHsf10-Pro	ATTAATAAATAAATGGAAGAAAAGAGAAGAAAAACCTGAAGATTTTCAGGGAGGTATTCGTGCTTCATGGAAAGGTCAATGGCGCGTTTAAGACGTGCGTGGCGAGCGTCCACTATCTCCTTCGGAAGCCGATTAAGGGCTTCCTTGATATCCAGATCGTAGTAAGGGTCATACAGATCATCGTAGCGGAGCCCTAATTCCCAAAAATTATCGAAGCATACACAAATCAATAGGGTTGAGAGATTGAATTAGGGTTTGCGAATTAGAAGACAGCGAGAGAGAGAGAGAGAGAGGGAGAAGAGAGATAAACCGTATTTGCGAAGGCGTTTGGAGAGGGATTTCATGTGCTGACGAGCGAACCAGTTCTTCTTTGGATCCACAAACGATTGCAACAACGAC…
>CrHsf11-Pro	TCCTCAGAACACACATGATTAGAATGTGACAAAGAGTTACTACCAAACTAGTAAAACCAGTTGCTAAGAGTAAGGCAGTGTAATAAAATGATTCCCATGTAAAATAGATTGCACAATCTGCTCCTCTTGCAAGAAACAACAATCGACAAAATTTGATTCTACTCGAAATTAAGAAGAAAAAAAAAATCTAGAACAAAGGTGAATCCATTTCCAAGACAGTAAGGCTCGGCTAACGTTTTATTATACAGGCAAGGAAGGAACCACCTCTCATTGAATTATTTTGTCTAATTTATGTTGAGCTCTCATAAGGAAACATAAGCACAATGCCTGAACCTTTGAGTTGTTAGATCATGGGTTACACGTATAATTATGGGTCTCTTTTAATAAAATTAGCTGTTA…
>CrHsf12-Pro	ACTTATACCATAGAAGTAAATAGTTAATTTTTGACAAAATTTCAAAATTAAATTAATTAAAGCATGCCCAAATTAATATCTAACACTACTAATTATTTGCAATGAAAAAAAATGAGAAACAGCACTTTTGCGTGGGTAGGCGCGTGATTTTATTTATAGCAGAAGAGTACAACACTCCGTTTGAATGGAAGAAAATTTAAATCTTAAATAGCAGACAAAGTCAAATAAAGTCGCTTCTTCCGTAGAAAACCTCAAAGCTTTATAGATCACAATGTTGGAACAAAATCAAACTCAACTTAGAGAGAAAGCCTTGGATGGAGGAATATGTTCTAAAAATATTGAAAAACATGATATAGAAAGCTTCATCACACCTAAACCACTTAAACTAACATGATTTTC…
>CrHsf13-Pro	TTTAAAAATTGTGTAAACTATTCTAGAATAAAATCTTTCGTGATTAAACCTATTTTAGTATTTTTTGAATTTAAATATACTTAGAGTATATTTAAATATACCAAAAGCGAGAAACTGATGATGATGTATGTTTTTTAAAATGTGGGTTTTTAATTAAGGATAGATATACCGTGATTTTATCATTTTATATGCAAGGTAATTCCCAAATTCGATCTCAATATTTATATGGATTATTAAATTAGTTTTTAAATTCGTAATAATTATAAGAAGAAAAATATTTTTAAACTAATTTGTATAAATTATATTAATTTTTCATCATATTAGTTCTTTATAAAAATTTATATGACTGACAAAAAATAATTTAAGAATTTTATTATTATTATTATTTAAATTTAGAAA…
>CrHsf14-Pro	AATAAAATAAATATATATAATTTTTTATAATATTCATGTAACCATGCTAGTTAAATATAATAATCGAATATTTTCATGTAATTTTCCATCCTATTCAACCTGGTTTTGATTGTATCATTATTTTTTGTTGGAGTTAAAAAATTAAGGAAACCTGTTCGCAACCGTATTTATTTTTTTAATATTTTTATTTTAATTATTTTATAATTTATTATATTATTATATTTTAAAAATTATATATTTTATTATTTTTTATTAAATAATTTTATATAATAATAAAAATATTTTTATAATTTAATATATTGAAACAAAATTAAGGATATAAATAAAAAAAAATACAACAAAATAGTGATAATCGTCTTTTATATTTATCTATTTTCACTTTCAAAAATTAGATTTTAT…
>CrHsf15-Pro	TAATATATATCATATTTACTATTTATAATAAAAATAAATAAATTTATACTTATTTCTACATTTTATTTAAATTTGGAAAAACTCATAGAATATACTTATAATATGTGTTTGTGAATATATTCAAACTTTATAATTTACAAATAAATTTATTTAGTTACATTAAAAAATTTAAAATACAAAATATTTTAATTGTTTTATCCAAATAAAATAAAATAAAATATAATAAATTGTCTAAAATTCAAAAAAATAAAATGAGGATTTAGAATTTTATAAAAAAAATATTAATAGATATTTTTTCATATAATTTATTTTATTTTTTAATTTTTATTATCATTATTTGTCTATGTCTGTAAGAATTGGAAAAGGAGAATTTACATATGATGTTGGAAGGATAGTTGT…
>CrHsf16-Pro	ATATATTTATAATTATATAAATATATTAAATTTTAACTAATTTAAATATTTATTGATATATTACTTAATAATATATATAATTAGTATATTACATAATAAAATAAAATTATGAGATAATATATTTATTATTTTTGTTTGGTATAAATATTATATTATATTATACTTAATAAAAGTTTTAAATTAACGATCAAATTAATCAACATTATATTATATAAAATATTATTAAAATAATATAAATTTTAATTTTAATATATGATATTACTAAATTTTAATCTTATTATATATATGTATATGTAGATAGGTTAAAATAAATAAAACATTTAAAATGTAGACTTGAAATATATAAAAAAGGAAAATATTTAAAATTGAATTCATTTAAAGTTTTTAAATTTTAACTTA…
>CrHsf17-Pro	GAATTAATATATTTTTAATTAATTATACACTTAAACACTTTCATTAGTTAATATTTATTTTTATTAACATTAAATATATTAAAAAATATTTTACTCTAACTGTTTAAATTTATTTTTATCAAAATATTTTTATTACTTCATGTCCGTCCAAATCCAATGTACCTGGTACCTACATGTTAATTTTATCTTTTCTTTTTAAGGGAACCTACATGTTGTTAATAACGAATAGTAGTATTTGATAAATTCAATAAAGCTGTTACGATATTGAACAGTCAGAAAGGTTTGTGACACTTGTCACGCTTGCAGATGGTCACCGACAACAATGACGCCAGTAACCGCATGGACCGTAACCGTTAATTTTTCTGCAACAATTTTATCCGTCTGCCACTCTACGTCTCT…
>CrHsf18-Pro	AGATGGAGCTATAGTGTGTCACTTTCCACCTTCAAAGCAAAAGAGAGAGAGAGAAGAGAAGAGTGTGGAAAGAAAGAAATCAGAAAGAGAGTGATGAATGTGACCCCTCCAACAATGGAATCTAGAGTTAGAATGTTGTGCACGGAATCATTTTCTTTTTTCTATCATACAGTTAAGCAGCATTGAGAATTGAAATATATGTATATATCACACATACACCTTATCTACTCAAATGACAGAAGGTTCATTTATAATACTTATGTAGTATGTATAAATACATTATTCCATGATTGAAGACTAGAAAGAGTTAGTTCTATTATTTTATTGTGTCTATGTCACGGGTGTGCTTTGGATTGTACAAAAATGAATAAAGGTCAGAATGTTCTACCTTGATAACAA…
>CrHsf19-Pro	TAATAATTTTATTAAGTATAATAATGTATAAAAAAATTTAAGAATGGAAAAATTTTTATATCCGCCTTATCAGGAATTGGCTAAGATCGAAAATAATTTTAGATAAAATTTGATTTTTAAATACAGAAACAAGATAGATATAGAAACACTAGTAGTTATGGTGTCATTATCTTACTTTTAAAATTATCAAAATATTTTTATTAATATTGACTCTAAAATGTTTAATGATTTTTTATACTTATAAATTTTTTTAATAAATTATTTATATAGGATTTAAATCTATTTATTAACTTTCTTAAAAATATAGGTTTTTAAATAAATTTGTAAAAAATTTTGTAAACTTTAAATTATGTTAACCTTTAAAAAATAGTTTTAAATAGATAATATAAATCCAGACTT…
>CrHsf20-Pro	ATGGAAGAGTATTAACTAGGGAGTTACATGTAACGATAATTTGCTTAGAGTTGCATTTTACCTGAAAATTGTGATACACAAGAGCACCTCATGCATGCTATGGGTTATGAAGAAAAAAGATTGTTTTTTTTTTTGTGGGGGTGGGTGGGGAAGGAGTACACAAAGAGAGTTGGAAAAGCTGTAAAAATTTTGCCAGTTATTTATAGGAACTTTTGGGTCCAATAATTCAATCACCTGGACACGTCAGCAGAAGGAGGCCTAATTGTTGTGGAAGAGCCAAAGCTGGAATCTCAACGTAAAAAAGTAAGGGAAAGTAAAATAGAAACAGCTAGAGCTAGCTATTCTAGCCTTGTGCATACAAGTAAAAGCTACTAACGGAACCACCACATACACTTGTGC…
>CrHsf21-Pro	TAATTAAAATACTATATATAATATGTTAAATATGAAATAATATTATAAAGACAACATAATGCAATTAAAGGTAAAAATAAAATCAAATCAAATGATTATTATATTAGAAAAGGATCACATATAATAATAAAAATCATATCAAAATAGTAAAAAAATATTAACTAACCAATGAAATCAAAAATCAATTTATAACATTATAAAATAAGAATACAAATAAAATAATTTATATGTCTAATAATTATACATTATTATTGAAAAATTAAAATTAATAACATTAATATAATGTTAAAATTAAAAAATAAGGAAGCTTATAATAATAACTTTATTATTATTATTATTATTATTATTTAATTTAAATAATATATTTTTTCAATTAATAAAAAATACAAAAATAATTAC…
>CrHsf22-Pro	TAATTGATAATATATTAAAATTAAACTTATATATAAAATATCATAAATTATTTTACAATATGATATTAAATATATTTTTTATTTTCTACCAAAAGAATTTAAATACTAGCAAGAGGTTAAGATAACATTAAATGAAATATCTAAATATTATTAGAATTTTTTTTTACAATATAGAAAACATAAAGATCAAACTCCAGATCGAAAATTACTTTAATTTTTAACCCTCACTACTAAAAAAATCTTAATAATTTATAAATATCATTACCTTGATATAACTATTTTAGAAAATTATATAAAAAAAATTAAGATTAAAATATTATTATGACATATTTTTAATATCTTTAAAATTAGATCGTTCTTAGTTAAAAAAATAATTTCTTTATAATTATTTGCATGTCA…
>CrHsf23-Pro	TTATTTTTTACTGATTCAATCAGTTTATTGTCAGTTTTTTAATCAAACAATTTTGTAGTTTAATTTATTCAAAAATAAAATTAATTTTCAATAAAGTTTTACGATTTAATTTAAAAAAAAATTAATTCAATTAATCGGTCTAATTCAATTTTCAGAACACTTGTTTAAAAATATGTGTAAATATAGGAAGGAGTTGTTAGCATATACCTACTTGAATTTTATAAATATTTTAATAAGCTATATTTTAAATTAATTTTTAAAAAATAAAATAAAATAATTGCTTGTTGATATATTTATTTCAAAAAACTAAGTGTACGTTAGCAATTATGACAATCTCCATACATATATGATATAAATTATCTTCAAATGGATGTAGTAACATTTTTTTTAACATAATCG…
>CrHsf24-Pro	TATTTTAATAAAAATTATTATTGTTCACTTATTTATTAATTATTATAAATAATTTCTTTATGCAGCTCATTTTTTTTTATCTATTATCTTTCTTATTTATTGAAAATAATTTTTTTCTTCTATATTTAGCTATTCAAAGATCATATCTTTTTCATCATAATTTTTATTCTATTTTATACTTTTTTTATTTTTTAACTTTTATTTTCTATTTCATCCCTCTATCAAATAAATAAAATTTTTATTTTTAAAAACAATTACATGTATAGACTTTTTTTTTAGTTTAAATACATGTAGTAATATAATACCATAAAGAATACATGTATATTTTTTTAAGTCGAATTCGTCCTTATTAAAATTTAGATAAACACTATCACTTTTTTTAAAAAAATAAATCATCAT…
>CrHsf25-Pro	AGACACAATATTTATTGGTATAATATTTAAAATTTAAATTCCATTTAATTAATATTATAATAATATTAATTTTTTTAATTATCTAAAAAAGATATTTTTAACTTGGAATGGTGTATCAAAATTTAAAATTTAGACCAAAATAAAAATAAAATTAAAATAAATAAATAGCATATGAGCGGGAAAATTATAAATAAAATATAAAAACAAATACCCAATATTGAAGAAGTTACATACTTTAACATAGGATGAAATTTTTAAAAAAATAATTTTATTTTAAAGTACATACTCAAATTTATAATATAAAATCATTTGACACTAAAAAAATAGAATACTTAATATAAGCAAAATGTCTTCGATTTGCTAATTTTTTTTTATTATTATATGAGAGGTGTTTTGTCA…
>CrHsf26-Pro	GATGAATCAGCTGCAAACAGAAAAGACCTAACGACATAATGGAAGGAAAACGTTGAAGGGTCAAATTAAGGGGAAACGTGAAGAGAAGAGGATTTTTTTAGGATTTCACATCCAAAAATACATACACATTTTTGTATATATCAATCGGATGACTGATAATTTCTTTTTTAAAAATCTAATAACTTATATATGACTGTATGTAGGAAGAACTTTTCCGTTTTATTTTCTTCTTGATATGACTAAAGTTTAATTAAAAAGAGAGAATGTTGCCTATGGATAGAAAAGATGGCAGAATCAAAAATAATAACTAATATCTTTTTAATTAAAAATTAAAAGTAATCTTTTATCAAAAATATTATTGATATATTTTCTTCCATAATTTTTAATACATTCTTGGTT…
>CrHsf27-Pro	ATAATTCTTGAGCTAGCAGTGTTAAACTTTTCTAAAAAACTTCTCTTATTTATATATATAATTATATATATATATATATTTAAAATATATATAATGTTTAAAAAAAAATACTATTGTTAGATGCATGCCCCATGAATCCAGTCTTTCATTACCACAATGTCATTGATGGATAAAAAATTTAGATGGACTCCTCTGAGTGATCACTTGTGGGCAAATGAAAATGTTGGTTTGTATGATTATTTATTAAAACATAAAATGCTATGTTACAATGACTCCTTCAGTGTCCAGATTTGACATGCTTATATCCAATTAATGCATTATTCATTTAAGATGAAAATATGCACGGGAACTTAAATGATTAAAATTCAATATGAAGCAAACAAGGGGCAAATAACAAGT…
>CrHsf28-Pro	ACTAAAAAATAGTATTTATTTTATTGAAAAGAAAATAAAAAAATAGCCACTATTATAAGTGTATTTAGTAAAAGTAATAGATAAAATAGTTTAAAATTAAAAAGTTAATTAAAAGTTAAAAGATAAAAATTAAAAATTTTAATAAAATTAGTAGTTATTAAATATAAAAATAATAATTGTAAAACACAATTAATTATTAAATTAGAACTTTATATATATATATATATATATATATATATATAAAGAATGAGAATGTATTCAACTTAAAAAATAATAGGTTATAAAAATATATTAAAAACGAAAAATTAATAAGAGTTAAAAAATTTTGAAAAAAAATTAAAAAGATGATAGTACCTAAAAAACTATTAAATAATTTATTATTAAAATACCAAATACTTT…
