# Supplementary material for: Functional Characterization of Heat Shock Factor (CrHsf) Families Provide Comprehensive Insight into the Adaptive Mechanisms of Canavalia rosea (Sw.) DC. to Tropical Coral Islands
Source: Int J Mol Sci. 2022 Oct 15;23(20):12357. doi: 10.3390/ijms232012357 (PMC9604225; doi:10.3390/ijms232012357)
Supplement: Supplementary file 1 [file ijms-23-12357-s001.zip › Table S2.xlsx]

## Sheet: cis-regulatory elements
	CrHsf1-pro	CrHsf2-pro	CrHsf3-pro	CrHsf4-pro	CrHsf5-pro	CrHsf6-pro	CrHsf7-pro	CrHsf8-pro	CrHsf9-pro	CrHsf10-pro	CrHsf11-pro	CrHsf12-pro	CrHsf13-pro	CrHsf14-pro	CrHsf15-pro	CrHsf16-pro	CrHsf17-pro	CrHsf18-pro	CrHsf19-pro	CrHsf20-pro	CrHsf21-pro	CrHsf22-pro	CrHsf23-pro	CrHsf24-pro	CrHsf25-pro	CrHsf26-pro	CrHsf27-pro	CrHsf28-pro
MeJA-responsiveness element	2	2	0	0	2	4	2	0	0	2	0	0	2	0	2	2	4	0	0	8	0	4	0	0	6	0	0	2
auxin-responsive element	0	0	1	0	2	0	1	0	1	1	1	0	1	0	1	1	2	0	1	0	0	2	0	0	0	1	0	0
gibberellin-responsive element	0	0	0	1	3	3	0	2	0	0	1	0	2	1	0	0	0	2	0	2	3	2	1	0	2	0	0	1
salicylic acid responsiveness	2	1	0	1	2	0	0	0	0	0	0	0	0	1	0	0	0	0	0	4	0	0	0	1	1	1	0	1
ABRE	2	1	2	2	2	4	1	3	1	1	2	0	2	1	0	1	3	0	2	5	2	5	0	3	1	2	0	1
ERE	11	3	2	4	1	0	5	5	4	2	2	0	3	3	5	5	5	2	9	2	4	2	8	0	4	6	3	2
ARE	1	2	0	1	0	0	1	2	4	1	2	2	2	1	0	1	2	1	0	7	0	0	1	4	0	4	3	1
MBS	0	0	0	0	1	1	1	3	0	0	1	1	0	0	0	0	1	0	0	0	0	0	0	0	0	1	0	0
LTR	1	2	0	0	0	0	1	0	0	0	1	1	0	0	0	1	0	0	0	0	0	0	1	0	0	1	0	0
AT-rich sequence	0	2	1	0	1	0	0	0	2	0	1	0	1	0	0	1	0	1	1	0	1	0	0	0	0	0	0	0
TC-rich repeats	0	1	1	1	0	0	0	0	1	0	0	0	0	0	0	0	1	0	0	1	2	1	1	1	0	1	0	0
MYC	2	2	1	3	6	0	3	4	6	7	2	3	3	2	2	1	0	5	3	1	2	2	1	1	4	1	6	4
MYB	2	1	3	3	2	7	5	6	1	2	5	3	4	3	4	1	2	3	4	5	4	0	4	5	7	5	1	0
as-1	1	1	0	0	1	2	1	0	0	1	0	0	1	0	1	1	2	0	0	4	0	2	0	0	3	0	0	1
HSE	2	1	1	1	1	0	5	1	3	9	6	1	5	2	1	6	0	9	8	1	3	4	1	7	3	1	6	7
