# Supplementary material for: Functional Characterization of Heat Shock Factor (CrHsf) Families Provide Comprehensive Insight into the Adaptive Mechanisms of Canavalia rosea (Sw.) DC. to Tropical Coral Islands
Source: Int J Mol Sci. 2022 Oct 15;23(20):12357. doi: 10.3390/ijms232012357 (PMC9604225; doi:10.3390/ijms232012357)
Supplement: Supplementary file 1 [file ijms-23-12357-s001.zip › Table S3.xlsx]

## Sheet: Different organs
	FPKM values
#Gene id	root	vine	leaf	flower	fruit
CrHsf1	17.2641	4.92827	6.14152	29.7288	6.5517
CrHsf2	29.4573	8.63653	4.35859	8.29625	6.54266
CrHsf3	11.987	7.31645	3.07203	8.44945	6.29981
CrHsf4	12.4643	5.00236	6.11194	4.60191	7.77869
CrHsf5	0.310658	0.001	0.001	0.800974	0.001
CrHsf6	3.12625	17.808	6.16204	1.56665	6.86603
CrHsf7	800.891	248.573	4.13476	105.348	106.633
CrHsf8	70.2459	0.16944	0.855703	1.37563	4.34896
CrHsf9	55.4001	9.5175	7.31029	26.3766	5.0599
CrHsf10	12.2965	6.54585	0.66224	0.626356	0.239923
CrHsf11	4.75055	90.1781	0.141801	15.7125	33.553
CrHsf12	0.0728429	1.08742	0.0628858	0.0614662	0.39538
CrHsf13	60.5945	10.7299	2.4937	5.24078	16.038
CrHsf14	2.97118	0.105496	0.955296	0.01	0.01
CrHsf15	8.45944	0.476233	0.523527	2.15302	2.10127
CrHsf16	110.061	40.2233	2.79405	28.2943	26.4663
CrHsf17	35.4148	13.4352	2.68337	9.41285	21.0076
CrHsf18	0.205481	3.9228	1.70162	0.584283	0.210703
CrHsf19	65.3099	96.2051	0.001	7.91041	15.5397
CrHsf20	5.19807	11.4455	1.40135	3.60349	3.49581
CrHsf21	70.5254	41.4763	12.047	34.5513	38.7355
CrHsf22	35.7514	6.00618	23.19	2.1152	0.73013
CrHsf23	11.2974	4.79866	12.4019	6.29282	8.80265
CrHsf24	92.9575	69.0082	7.74661	56.9493	66.6772
CrHsf25	238.872	123.007	5.14614	146.427	65.6273
CrHsf26	18.8855	12.7922	10.9939	14.5545	17.902
CrHsf27	0.553895	4.10218	0.294929	0.946893	0.0854172
CrHsf28	33.9155	7.87478	4.28217	8.30717	6.70413

## Sheet: SCBG and Yongxing Island
	FPKM values
#Gene id	SCBG-1	SCBG-2	SCBG-3	YX-1	YX-2	YX-3
CrHsf1	23.04	22.01	22.01	15.84	13.55	12.57
CrHsf2	4.84	4.7	3.75	10.24	8.87	9.44
CrHsf3	3.87	4.28	3.08	4.96	4.23	3.22
CrHsf4	4.58	4.69	5.88	4.31	4.13	4.94
CrHsf5	0.17	0	0	0.29	0	0.08
CrHsf6	0	0	0.03	0.03	0.06	0.09
CrHsf7	5.15	20.95	3.37	186.92	165.33	217.92
CrHsf8	6.09	5.68	6.76	1.48	0.56	1.02
CrHsf9	1.18	3.14	0.63	15.7	25.03	27.09
CrHsf10	0.51	20.32	0.43	0.78	0.62	1.22
CrHsf11	0.07	0.05	0.12	0.05	0.27	0
CrHsf12	0.54	0.12	1.58	0.06	0.35	0.03
CrHsf13	10.25	19.46	4.44	9.47	9.83	15.03
CrHsf14	8.51	5.1	7.74	0.8	0.69	0.82
CrHsf15	9.44	15.21	6.52	10.83	10.09	6.89
CrHsf16	24.14	21.2	8.16	16.13	22.21	14.17
CrHsf17	6.91	9.98	3.94	28.37	29.92	32.02
CrHsf18	0	0.23	0.08	0.36	0.08	0.28
CrHsf19	0.12	0	0.12	0.08	0	0.1
CrHsf20	0	0.22	0.24	0.19	0.37	0.08
CrHsf21	19.41	17.94	12.12	42.38	40.55	59.47
CrHsf22	16.88	34.76	19.77	26.14	14.21	29.47
CrHsf23	14.94	18.66	15.49	10.72	9.72	9.49
CrHsf24	2.43	12.34	2.09	35.03	38.67	70.23
CrHsf25	22.28	34.7	4.48	65.98	86.57	100.64
CrHsf26	15.23	13.1	13.9	7.6	8.71	9.67
CrHsf27	0	0	0.04	0	0.04	0
CrHsf28	8.04	7.49	6.54	16.72	14.02	15.72

## Sheet: Salt-Alkaline-Mannitol
	FPKM values
#Gene id	CK_2h_root_1	CK_2h_root_2	CK_2h_root_3	Salt_2h_root_1	Salt_2h_root_2	Salt_2h_root_3	Alkali_2h_root_1	Alkali_2h_root_2	Alkali_2h_root_3	Mannitol_2h_root_1	Mannitol_2h_root_2	Mannitol_2h_root_3
CrHsf1	8.4895	7.61586	8.12455	7.471	6.53033	6.03353	6.7315	7.27752	7.12806	7.96041	6.25142	7.46644
CrHsf2	10.367	8.36025	13.1151	10.1764	9.49427	9.76022	12.3987	10.5472	10.6625	13.7221	13.6498	18.1681
CrHsf3	13.9051	10.5258	13.7836	8.05396	7.85052	7.42914	12.912	12.649	12.4439	11.5939	10.0818	12.9645
CrHsf4	7.4503	6.74651	8.64676	9.21155	6.8409	7.75694	8.88968	8.62828	6.79899	7.33187	6.65803	8.81072
CrHsf5	5.81903	7.51309	5.03334	0.587527	0.478185	1.34301	9.86118	7.62751	8.01184	1.48385	1.2408	1.24773
CrHsf6	2.29376	2.49699	3.11293	2.21149	1.86345	2.23897	1.2899	1.28674	1.15139	2.9438	1.81001	0.754049
CrHsf7	22.876	26.6988	24.781	40.3527	48.5028	3.4677	31.9449	40.5332	40.5346	35.5743	41.0463	31.3831
CrHsf8	139.237	103.018	114.323	49.7537	48.0749	52.886	163.271	123.907	139.116	119.047	131.937	154.325
CrHsf9	9.27131	16.8451	22.9585	5.56153	4.31451	3.05307	38.5489	39.6102	14.9599	17.5983	17.6096	26.9753
CrHsf10	1.37653	1.08912	1.16627	2.7825	4.2336	2.53028	1.92586	3.77373	2.59798	1.01427	0.940793	1.83476
CrHsf11	0.108962	0.0411897	0.226838	0.468664	0.16953	0	0	0.0193155	1.14555	0.651009	0.174666	0.0195157
CrHsf12	0.696603	0.470232	2.1753	0.312105	0.387079	0.959234	0.782887	0.926142	1.74371	0.810772	0.354494	0
CrHsf13	9.65417	5.74791	8.87669	10.8424	9.48175	7.59971	8.10131	7.53007	7.9239	8.59379	10.2598	11.8157
CrHsf14	1.70889	5.70629	3.439	1.22504	0.598232	1.09815	0.780275	0.949188	0.819506	1.13445	1.11603	1.30591
CrHsf15	27.9566	16.9375	33.749	18.6585	14.6643	17.8347	38.839	38.6338	34.7416	26.3316	20.2223	35.1127
CrHsf16	78.6289	72.4401	89.0117	25.9902	34.6009	17.3134	71.165	56.521	84.3314	50.6305	47.4412	57.6564
CrHsf17	2.31481	1.86352	2.70696	8.96279	8.67035	4.60027	2.72433	2.53297	1.44953	5.89839	1.55246	4.27392
CrHsf18	2.36144	1.64218	3.89576	1.1179	1.12649	2.83454	2.5155	1.85609	1.76687	3.50905	3.29337	1.95514
CrHsf19	0.0957714	0	0.0249223	0.257456	0.0232824	0	0	0.003	0	0.238417	0.0213225	0.0643247
CrHsf20	3.49018	6.5266	3.5943	3.46018	3.24949	2.43369	1.95879	0.987284	2.32843	2.99143	2.44688	1.39653
CrHsf21	33.729	23.7571	31.1554	18.7717	24.5037	20.0184	27.1443	30.777	27.6864	27.4771	30.7355	38.5732
CrHsf22	13.2514	11.6158	33.2243	31.9745	27.5272	21.5108	28.0487	24.3076	18.3133	49.1308	38.5162	79.836
CrHsf23	15.4236	15.4085	13.6097	21.2748	16.654	20.7911	10.1085	10.8775	11.2997	11.3399	11.5567	13.9525
CrHsf24	17.2309	20.3152	22.134	36.1219	29.2402	25.9517	27.4201	29.0102	23.9139	39.359	59.0486	48.9777
CrHsf25	31.6404	32.0996	39.0912	43.3259	66.2816	20.8674	15.2799	14.2257	14.9074	19.3376	21.3761	20.6213
CrHsf26	9.53761	10.0893	10.4402	11.4136	8.91552	12.0404	10.6498	10.9078	9.88814	9.27451	7.04162	8.76164
CrHsf27	1.87303	5.22603	2.32101	4.03611	3.12234	3.61087	1.27953	1.22535	1.11044	1.89742	2.70064	0.998427
CrHsf28	14.2722	9.14805	11.5203	17.0816	12.8183	18.295	28.0547	35.7539	26.6745	13.7423	8.29692	14.0977
	FPKM values
#Gene id	CK_2h_leaf_1	CK_2h_leaf_2	CK_2h_leaf_3	Salt_2h_leaf_1	Salt_2h_leaf_2	Salt_2h_leaf_3	Alkali_2h_leaf_1	Alkali_2h_leaf_2	Alkali_2h_leaf_3	Mannitol_2h_leaf_1	Mannitol_2h_leaf_2	Mannitol_2h_leaf_3
CrHsf1	25.1486	27.4431	24.8841	13.7	14.2967	15.276	14.4877	10.8257	13.6446	13.8589	15.0381	9.67853
CrHsf2	7.33943	11.0784	7.26409	6.65083	7.22157	6.81764	6.60103	3.8266	6.48694	8.4875	7.73029	4.75332
CrHsf3	5.74667	8.26257	7.30021	4.3535	5.89937	6.9737	6.0764	3.5823	5.78733	6.02603	6.1538	3.63242
CrHsf4	7.28425	6.74681	6.87682	7.23929	5.4207	5.21605	5.70794	5.84045	5.08257	5.56052	4.63312	5.8628
CrHsf5	0.400658	0.528747	11.3544	0.312025	0.503358	0.0722284	0.750878	0.46682	0.681226	0	0.37126	0
CrHsf6	0.170327	0.0267595	0.244609	0.303984	0.101899	0.562937	2.04828	0.413446	0.563114	0.137596	0.131525	2.18582
CrHsf7	12.2486	14.0035	15.8869	26.9896	18.3813	5.35245	12.7573	18.703	11.6677	16.828	12.3085	10.7827
CrHsf8	4.21299	62.5409	29.2818	8.35902	6.00285	2.55097	28.5688	1.68619	22.8749	11.8781	6.4667	1.14754
CrHsf9	4.86459	7.16198	8.57059	18.1611	14.66	13.8212	16.7063	16.2392	13.5602	14.0743	11.8849	11.2902
CrHsf10	3.47418	7.46443	7.91101	1.18828	1.15157	1.91842	1.75973	2.18805	3.22256	12.8647	5.80048	3.468
CrHsf11	0.149147	0.0803381	0.326387	0.829661	0.229442	0.845031	1.158	0.599941	0.483027	0.330476	0.17769	0.300106
CrHsf12	0.0486484	0	0.0465765	0.0947161	0.043656	0.0877007	0.136759	0.047235	0.0919059	0.0943198	0.0450789	0.319767
CrHsf13	8.33779	15.5708	9.45873	6.00325	4.60223	4.59435	4.89416	2.53558	5.26045	11.0107	7.95925	6.41109
CrHsf14	9.69067	5.39689	3.90314	0.99758	0.459799	0.82329	1.37776	1.27618	0.568163	0.820639	0.51607	2.80309
CrHsf15	7.0035	16.2773	13.5733	8.61188	7.35345	9.37969	11.664	3.24859	9.45448	10.3625	9.58993	3.86059
CrHsf16	19.1941	45.0445	19.2062	17.5821	11.7521	7.89962	23.2007	5.27386	18.5713	21.3526	13.1849	4.28681
CrHsf17	2.43086	1.63297	2.30058	15.4223	7.27133	10.9052	8.71867	10.092	6.91492	27.9798	6.34324	35.7343
CrHsf18	0.304937	0	1.08439	0.636105	0.039092	0.824586	0.612306	0.507561	0.0822976	0.633443	0.242197	1.26806
CrHsf19	0.0234092	0.0661995	0	0	0.003	0	0	0.003	0	0.022693	0.0216916	0.0219814
CrHsf20	0.726041	0.547517	0.590851	0.494748	0.749263	0.294495	2.21111	0.211484	0.411488	0.422295	0.437299	1.26125
CrHsf21	25.1087	37.6418	21.4999	15.4919	14.7304	18.3024	22.0094	16.1097	20.6554	33.0538	33.3976	24.2966
CrHsf22	33.7985	14.3015	19.6671	16.78	13.3452	11.4751	10.2051	13.8558	7.34293	34.2933	13.3974	75.0048
CrHsf23	22.0839	23.5051	19.128	19.1509	15.3183	19.7506	15.7984	15.2177	15.6543	20.4064	18.1228	15.5976
CrHsf24	13.4404	20.3762	9.78437	22.7109	15.5442	15.3714	18.1274	18.5424	19.7163	29.1204	21.924	23.4769
CrHsf25	11.0042	46.9166	28.2739	27.9832	13.5528	11.0069	34.512	6.24168	28.903	27.4034	11.4713	4.2439
CrHsf26	13.2055	12.5189	9.67668	9.19484	10.1227	11.0625	9.51324	8.03187	7.91333	9.69583	9.81152	8.82687
CrHsf27	0.130806	0.0411011	0.125235	0	0.273893	0.157207	0.572006	0.0846705	0	0.0845359	0.121208	0.573195
CrHsf28	17.1034	19.4108	18.8026	14.4644	13.7685	17.7749	12.8487	9.33038	10.2976	18.5215	14.3669	13.755
#Gene id	CK_48h_root_1	CK_48h_root_2	CK_48h_root_3	Salt_48h_root_1	Salt_48h_root_2	Salt_48h_root_3	Alkali_48h_root_1	Alkali_48h_root_2	Alkali_48h_root_3	Mannitol_48h_root_1	Mannitol_48h_root_2	Mannitol_48h_root_3
CrHsf1	6.93087	6.7038	5.46159	11.1012	13.8866	8.90528	9.22323	10.2647	8.03496	8.83936	7.88353	7.36682
CrHsf2	9.41542	10.9926	10.674	8.74152	8.70173	10.0452	11.8288	15.4241	10.903	7.65821	6.94106	9.84563
CrHsf3	12.9373	13.7608	11.6714	14.6806	20.422	13.9855	15.6252	15.3215	13.8818	18.8841	15.8323	22.9883
CrHsf4	9.67914	11.0682	8.3656	8.38798	9.4161	12.2089	11.2989	5.27078	6.90592	5.62723	7.37772	6.05831
CrHsf5	3.22521	5.9516	5.08239	1.77735	7.36392	0.0870112	0.523315	2.9565	14.6839	10.4982	4.32807	4.94959
CrHsf6	0.742678	0.632534	0.3542	3.77791	2.60878	1.81868	1.94662	0	0.252217	0.0858268	0.223023	0
CrHsf7	56.9817	95.2331	49.7165	68.7	27.5115	21.7926	28.6233	24.0792	15.1657	69.9774	75.0366	49.8205
CrHsf8	43.6218	43.6437	35.5457	34.7389	76.5134	36.0038	43.0209	49.3951	105.936	75.4196	56.6905	80.9743
CrHsf9	6.76198	12.4249	8.38224	10.7064	5.12079	14.5534	17.2083	11.6835	11.5013	14.9728	14.2823	20.7782
CrHsf10	2.11008	1.22875	0.357979	10.0662	3.44447	6.38938	9.19818	13.4946	5.28355	1.51405	1.8442	2.12989
CrHsf11	8.297	13.7	10.5009	1.08696	0.870239	0.879165	1.36828	2.56051	9.93842	5.11048	3.05489	4.32744
CrHsf12	0.0489512	0.154854	0	0.647423	0.496743	0.10565	0	0	1.13459	0.490273	0.42997	0.713034
CrHsf13	6.45847	9.01366	5.29974	11.7242	8.24589	10.6935	10.7533	20.9286	8.0019	21.5617	18.7552	24.4741
CrHsf14	0.268993	0.661843	0.277959	1.97648	4.70108	1.6933	1.55186	0.140903	2.69677	0.808232	1.75018	0.629712
CrHsf15	12.8103	14.2001	14.3576	13.8988	14.4761	14.6554	13.9188	6.03776	12.2181	10.8585	11.305	14.9314
CrHsf16	85.7041	69.3355	75.3945	42.3515	77.0497	30.2861	31.8456	23.2195	64.6164	103.233	116.434	154.269
CrHsf17	3.68304	3.91333	2.93425	13.0145	8.55904	5.67353	5.74793	3.35778	4.09607	1.74583	3.21036	0.877557
CrHsf18	0.131501	0.415994	0.135884	0.193246	1.03789	0.283815	0.0948311	0	1.64492	0.307312	0.17112	0.0912128
CrHsf19	3.88656	16.0951	5.03839	0.20769	1.46073	1.70307	1.52879	5.7991	0.987923	21.4683	13.1036	10.4157
CrHsf20	5.15044	4.69919	3.77455	13.2857	7.41351	12.6534	11.4192	0.61229	9.75661	5.01211	5.27619	1.21617
CrHsf21	20.1645	21.8259	18.6304	31.245	31.8638	38.7525	36.8243	51.2284	43.6936	48.2919	45.7266	48.0999
CrHsf22	4.8746	8.288	4.21709	30.3196	16.8721	34.7428	35.2347	12.7077	3.54508	2.49786	7.48648	1.29742
CrHsf23	14.2687	13.7668	12.5953	20.4166	19.8661	20.8629	22.0168	17.4902	16.9813	11.3208	10.1107	8.05397
CrHsf24	49.9204	65.6959	60.214	42.2668	39.0468	43.6034	45.1908	50.9927	36.9154	96.5213	85.9247	104.203
CrHsf25	36.2121	38.8997	64.1555	55.7889	61.1495	57.5194	57.107	35.629	26.6557	35.448	87.5547	29.4772
CrHsf26	12.3645	12.5753	11.244	10.4417	12.6273	12.4774	12.9492	10.7338	10.7572	7.07857	10.0733	7.16447
CrHsf27	0	0.0925272	0	1.83751	2.9681	0.568146	0.71188	0	0	0.0439417	0	0.182592
CrHsf28	32.9734	25.3447	23.4259	17.5172	18.1586	26.2356	29.8844	34.1867	24.8601	65.9517	84.6153	58.5197
#Gene id	CK_48h_leaf_1	CK_48h_leaf_2	CK_48h_leaf_3	Salt_48h_leaf_1	Salt_48h_leaf_2	Salt_48h_leaf_3	Alkali_48h_leaf_1	Alkali_48h_leaf_2	Alkali_48h_leaf_3	Mannitol_48h_leaf_1	Mannitol_48h_leaf_2	Mannitol_48h_leaf_3
CrHsf1	5.39742	6.2614	5.87273	18.4468	25.4463	20.0931	8.53003	8.4867	8.8507	16.6237	15.5595	14.7016
CrHsf2	5.01468	5.81699	4.33294	11.1788	11.1096	10.4461	6.66812	6.84776	5.16016	11.9683	13.0107	9.74261
CrHsf3	5.21896	5.4581	4.09544	14.1528	13.9106	13.3792	5.90836	5.2519	4.87897	7.51159	8.01464	7.69785
CrHsf4	6.41751	6.26818	5.3322	2.93483	2.96831	3.72494	5.2623	5.53898	6.47262	5.77045	4.83362	4.64108
CrHsf5	0.155856	1.15057	0.575547	39.6642	12.7579	8.36793	0.231824	1.41156	0.221321	0.297443	14.0868	13.9799
CrHsf6	0.386501	0.163043	0.152922	0	0.003	0	0.0273758	0.0555629	0.0522709	0	0.110899	0.0264845
CrHsf7	9.96005	16.5574	10.1797	3.23193	3.61947	11.9127	34.8572	32.4175	68.0036	45.639	28.0675	34.5332
CrHsf8	3.28396	9.05075	5.28393	50.9863	30.8164	51.6166	38.3328	7.77388	2.90163	44.7662	51.6992	50.7967
CrHsf9	24.0564	25.023	18.4944	4.57817	7.54093	8.03254	19.0306	15.9752	12.5817	10.7155	7.89785	7.74341
CrHsf10	1.97849	1.61787	0.81492	2.47628	1.35345	4.09295	0.633845	0.428825	0.77802	7.26123	8.25332	5.9861
CrHsf11	0.290091	0.509887	0.0382589	0.151283	0.188459	0.020045	0.390394	0.166812	0.176545	0.375673	0.541033	0.337928
CrHsf12	0	0	0.0436773	0.542796	1.05184	0.732285	0.046914	0	0	0	0.047512	0
CrHsf13	2.05008	3.79485	2.17512	8.71251	6.49357	7.07448	10.7713	8.49838	8.31351	18.9784	12.9367	10.2738
CrHsf14	0.151654	0.0852989	0.240012	2.16926	4.57583	4.96712	4.01735	2.72519	4.40961	4.38269	3.26355	3.94892
CrHsf15	4.6601	6.16117	4.17493	7.21884	7.55173	10.6968	6.83584	3.35758	2.24499	10.4197	4.01533	4.99966
CrHsf16	4.92583	9.12286	6.49222	45.9009	49.3863	49.2508	28.0861	13.2728	18.1007	33.1498	34.2696	27.6381
CrHsf17	11.4668	11.795	10.9876	7.4537	9.30893	9.43684	57.7965	69.5906	106.446	42.1601	26.1149	33.8879
CrHsf18	0.211823	0.125099	0.117333	0.0441863	0.0856252	0.122949	0.378084	0	0.20053	0.0404252	0.170179	0.365776
CrHsf19	0	0.003	0	0.0712334	0.0690188	0.0880924	0	0	0.0215519	0.13034	0.0457248	0.0218397
CrHsf20	0.741379	0.799241	0.228148	0.220932	0.24974	0.068305	0.700156	0.746058	0.601591	0.471628	0.354541	0.54189
CrHsf21	29.1184	29.0563	22.834	26.7237	27.6017	27.5035	32.5973	31.1192	42.4073	48.7067	35.4881	35.7152
CrHsf22	15.0832	17.8661	16.0827	6.62795	4.20744	12.5775	40.271	28.5193	57.808	28.4719	15.8076	20.0756
CrHsf23	14.1255	17.9155	14.0544	13.7041	22.1928	16.9595	21.2781	20.7694	20.0674	20.387	21.2503	19.3
CrHsf24	71.4977	73.735	62.207	17.1091	18.7888	22.5309	53.776	59.9271	66.5076	41.5365	30.5275	29.3545
CrHsf25	10.647	24.453	15.3993	72.3522	61.0813	94.441	112.237	94.5593	75.7762	136.373	116.491	101.459
CrHsf26	9.79995	11.4314	9.69552	10.2366	12.4608	11.7302	14.9973	13.939	12.3931	15.674	13.9693	13.7934
CrHsf27	0.0848061	0.0834749	0.11744	0	0.128555	0	0.16819	0	0	0	0.0425836	0
CrHsf28	8.60712	9.07495	8.85964	39.2345	21.3327	33.0627	22.5678	19.5831	22.3929	30.5444	25.7736	30.8436

## Sheet: Heat
	FPKM values
#Gene id	CK_2h_root_1	CK_2h_root_2	CK_2h_root_3	Heat_2h_root_1	Heat_2h_root_2	Heat_2h_root_3
CrHsf1	8.4895	7.61586	8.12455	2.87919	2.77963	1.8409
CrHsf2	10.367	8.36025	13.1151	6.37195	5.57697	4.21306
CrHsf3	13.9051	10.5258	13.7836	3.73383	4.13445	3.36888
CrHsf4	7.4503	6.74651	8.64676	18.8857	34.7219	24.0172
CrHsf5	5.81903	7.51309	5.03334	0.156498	0.416187	1.07497
CrHsf6	2.29376	2.49699	3.11293	0.831628	1.29748	0.732356
CrHsf7	22.876	26.6988	24.781	2777.53	3124.3	3784.38
CrHsf8	139.237	103.018	114.323	16.7073	12.6946	20.6423
CrHsf9	9.27131	16.8451	22.9585	429.29	379.897	449.8
CrHsf10	1.37653	1.08912	1.16627	154.194	123.253	156.808
CrHsf11	0.108962	0.0411897	0.226838	173.273	161.678	126.161
CrHsf12	0.696603	0.470232	2.1753	0.0950111	0.151602	0.0502017
CrHsf13	9.65417	5.74791	8.87669	12.5047	18.0083	19.0262
CrHsf14	1.70889	5.70629	3.439	3.26311	3.70254	3.51727
CrHsf15	27.9566	16.9375	33.749	5.75913	3.44603	3.36485
CrHsf16	78.6289	72.4401	89.0117	493.148	382.874	687.605
CrHsf17	2.31481	1.86352	2.70696	4.2291	7.11086	3.34464
CrHsf18	2.36144	1.64218	3.89576	0.850781	0.905018	1.48346
CrHsf19	0.0957714	0	0.0249223	19.499	17.9943	15.8951
CrHsf20	3.49018	6.5266	3.5943	0.815332	1.50836	0.374611
CrHsf21	33.729	23.7571	31.1554	25.6987	31.1942	30.9587
CrHsf22	13.2514	11.6158	33.2243	26.6602	36.4348	16.9738
CrHsf23	15.4236	15.4085	13.6097	11.2311	12.5434	11.1971
CrHsf24	17.2309	20.3152	22.134	69.1108	84.69	97.5552
CrHsf25	31.6404	32.0996	39.0912	762.887	561.62	745.67
CrHsf26	9.53761	10.0893	10.4402	3.42208	3.2809	2.79371
CrHsf27	1.87303	5.22603	2.32101	1.57538	2.35519	0.449943
CrHsf28	14.2722	9.14805	11.5203	6.08766	5.67047	3.8999
	FPKM values
#Gene id	CK_2h_leaf_1	CK_2h_leaf_2	CK_2h_leaf_3	Heat_2h_leaf_1	Heat_2h_leaf_2	Heat_2h_leaf_3
CrHsf1	25.1486	27.4431	24.8841	24.1345	22.1948	18.6875
CrHsf2	7.33943	11.0784	7.26409	7.84858	8.04954	7.87647
CrHsf3	5.74667	8.26257	7.30021	7.44693	7.27198	7.12973
CrHsf4	7.28425	6.74681	6.87682	7.55802	10.9648	9.55992
CrHsf5	0.400658	0.528747	11.3544	0.297347	0	0.21714
CrHsf6	0.170327	0.0267595	0.244609	0.10534	0.109256	0.307701
CrHsf7	12.2486	14.0035	15.8869	585.783	488.294	473.668
CrHsf8	4.21299	62.5409	29.2818	2.38676	1.36152	10.7482
CrHsf9	4.86459	7.16198	8.57059	36.0675	38.6871	40.8258
CrHsf10	3.47418	7.46443	7.91101	18.2924	11.2329	22.6453
CrHsf11	0.149147	0.0803381	0.326387	13.0257	6.49872	23.4026
CrHsf12	0.0486484	0	0.0465765	0	0.003	0
CrHsf13	8.33779	15.5708	9.45873	39.8417	38.9616	38.8498
CrHsf14	9.69067	5.39689	3.90314	0.51666	0.621606	0.362203
CrHsf15	7.0035	16.2773	13.5733	2.23582	0.627479	3.02215
CrHsf16	19.1941	45.0445	19.2062	49.8014	38.2186	72.179
CrHsf17	2.43086	1.63297	2.30058	12.1566	18.3887	12.5686
CrHsf18	0.304937	0	1.08439	0.404122	0.167658	0.157394
CrHsf19	0.0234092	0.0661995	0	55.8328	63.0214	72.2516
CrHsf20	0.726041	0.547517	0.590851	0.370445	0.489004	0.459065
CrHsf21	25.1087	37.6418	21.4999	42.649	41.3423	44.5078
CrHsf22	33.7985	14.3015	19.6671	27.7311	38.3735	22.0148
CrHsf23	22.0839	23.5051	19.128	7.91782	8.50679	7.96869
CrHsf24	13.4404	20.3762	9.78437	76.5916	75.2476	73.811
CrHsf25	11.0042	46.9166	28.2739	75.3651	51.1299	95.5174
CrHsf26	13.2055	12.5189	9.67668	14.8597	11.664	13.8572
CrHsf27	0.130806	0.0411011	0.125235	0	0.003	0
CrHsf28	17.1034	19.4108	18.8026	62.7172	59.9208	51.7007
