# Supplementary material for: Functional Characterization of Heat Shock Factor (CrHsf) Families Provide Comprehensive Insight into the Adaptive Mechanisms of Canavalia rosea (Sw.) DC. to Tropical Coral Islands
Source: Int J Mol Sci. 2022 Oct 15;23(20):12357. doi: 10.3390/ijms232012357 (PMC9604225; doi:10.3390/ijms232012357)
Supplement: Supplementary file 1 [file ijms-23-12357-s001.zip › Table S4.xlsx]

## Sheet: Primer pairs
Primer ID	Sequence (from 5′ to 3′)	Usage or purpose
CrHsf2-RTF	GACCCAGAACAATGGGAATTTG	Primer pair for qRT-PCR of CrHsf2 in C. rosea
CrHsf2-RTR	ATGAACTGGCTTCCGTCTATG
CrHsf7-RTF	TTGATGTTCCTGTGGAGGATTT	Primer pair for qRT-PCR of CrHsf7 in C. rosea
CrHsf7-RTR	TACGGTCTGGAGCCAAGATA
CrHsf9-RTF	GAAAGGCTAAGAGGGACAGAAG	Primer pair for qRT-PCR of CrHsf9 in C. rosea
CrHsf9-RTR	CTGTTGGAGTAGCTGGTGAATAA
CrHsf10-RTF	CCAGATAAGTGGGAGTTTGCT	Primer pair for qRT-PCR of CrHsf10 in C. rosea
CrHsf10-RTR	CTTGTGGTGATGGTTGGATTTG
CrHsf11-RTF	GGAGCAAAGACTACAAGGGATAG	Primer pair for qRT-PCR of CrHsf11 in C. rosea
CrHsf11-RTR	CTGCTGGAACAGTTGGTCTATAA
CrHsf16-RTF	ACTCAGTGCGCGGATTTAT	Primer pair for qRT-PCR of CrHsf16 in C. rosea
CrHsf16-RTR	TTCGTCGCACTGCTTCTT
CrHsf17-RTF	TTAACGGTTCTTCCTCGTCATC	Primer pair for qRT-PCR of CrHsf17 in C. rosea
CrHsf17-RTR	GTGTCAGTATCCTCCACCATTT
CrHsf19-RTF	GATCCATCCACCGACTCTATTG	Primer pair for qRT-PCR of CrHsf19 in C. rosea
CrHsf19-RTR	GCAACGAGGAAGAATGTTTGAG
CrHsf21-RTF	TACGCGAACGCAAACAATAAC	Primer pair for qRT-PCR of CrHsf21 in C. rosea
CrHsf21-RTR	CCGTTTCACTGGCATCAAATC
CrHsf24-RTF	TTGGCCTGAAACGATGTAGAA	Primer pair for qRT-PCR of CrHsf24 in C. rosea
CrHsf24-RTR	TCTGGCTCGTGTGATGATTG
CrHsf25-RTF	CTCTAAGATCAGACGTCGCAAG	Primer pair for qRT-PCR of CrHsf25 in C. rosea
CrHsf25-RTR	CCGGAGTTTGACGGAGAATTA
CrHsf28-RTF	GACATGAAGAGGAGGAGAGAATG	Primer pair for qRT-PCR of CrHsf28 in C. rosea
CrHsf28-RTR	CCTGAGAAACAGAACAAAGCATAG
CrEF-RTF	GACCTTCTTCGTTTCTCGCA	Primer pair for qRT-PCR of CrEF-1α in C. rosea
CrEF-RTR	CGAACCTCTCAATCACACGC
CrHsf1-BDF	CATGGAGGCCGAATTCATGGTAAAATCGAACGATAATGG	Primer pair for construction of CrHsf1-pGBKT7-BD for transcriptional activation in yeast
CrHsf1-BDR	GGATCCCCGGGAATTCTCACTCTCGAGTTTTATCC
CrHsf2-BDF	CATGGAGGCCGAATTCATGGATGAAGCGCAGGGTAG	Primer pair for construction of CrHsf2-pGBKT7-BD for transcriptional activation in yeast
CrHsf2-BDR	GGATCCCCGGGAATTCCTAAGTTTTTTCTGCTTGACC
CrHsf7-BDF	CATGGAGGCCGAATTCATGAAGGGAGTTACAGTG	Primer pair for construction of CrHsf7-pGBKT7-BD for transcriptional activation in yeast
CrHsf7-BDR	GGATCCCCGGGAATTCCTACGGTCTGGAGCCAAG
CrHsf9-BDF	CATGGAGGCCGAATTCATGAACTATCTTTATCCAG	Primer pair for construction of CrHsf9-pGBKT7-BD for transcriptional activation in yeast
CrHsf9-BDR	GGATCCCCGGGAATTCCTAGTTAGGACTTGAACCC
CrHsf10-BDF	CATGGAGGCCGAATTCATGAATTCTAATGTGATTAC	Primer pair for construction of CrHsf10-pGBKT7-BD for transcriptional activation in yeast
CrHsf10-BDR	GGATCCCCGGGAATTCTTATTTAGGAGTTGAGGC
CrHsf15-BDF	CATGGAGGCCGAATTCATGGAAGGATCAGGTCCGG	Primer pair for construction of CrHsf15-pGBKT7-BD for transcriptional activation in yeast
CrHsf15-BDR	GGATCCCCGGGAATTCTCAAAGTGTGCGCCGATCC
CrHsf17-BDF	CATGGAGGCCGAATTCATGGGAGAAGAACAAGTAAG	Primer pair for construction of CrHsf17-pGBKT7-BD for transcriptional activation in yeast
CrHsf17-BDR	GGATCCCCGGGAATTCTCAACTAGTTTGTCCCACC
CrHsf23-BDF	CATGGAGGCCGAATTCATGGAGGGAGCATCGTGG	Primer pair for construction of CrHsf23-pGBKT7-BD for transcriptional activation in yeast
CrHsf23-BDR	GGATCCCCGGGAATTCTTAGGACTCCGAAGCAAGAAG
CrHsf1-YEF	TACCGAGCTCGGATCCATGGTAAAATCGAACGATAATGG	Primer pair for construction of CrHsf1-pYES2 for functional verification in yeast
CrHsf1-YER	GATATCTGCAGAATTCTCACTCTCGAGTTTTATCC
CrHsf2-YEF	TACCGAGCTCGGATCCATGGATGAAGCGCAGGGTAG	Primer pair for construction of CrHsf2-pYES2 for functional verification in yeast
CrHsf2-YER	GATATCTGCAGAATTCCTAAGTTTTTTCTGCTTGACC
CrHsf7-YEF	TACCGAGCTCGGATCCATGAAGGGAGTTACAGTG	Primer pair for construction of CrHsf7-pYES2 for functional verification in yeast
CrHsf7-YER	GATATCTGCAGAATTCCTACGGTCTGGAGCCAAG
CrHsf9-YEF	TACCGAGCTCGGATCCATGAACTATCTTTATCCAG	Primer pair for construction of CrHsf9-pYES2 for functional verification in yeast
CrHsf9-YER	GATATCTGCAGAATTCCTAGTTAGGACTTGAACCC
CrHsf10-YEF	TACCGAGCTCGGATCCATGAATTCTAATGTGATTAC	Primer pair for construction of CrHsf10-pYES2 for functional verification in yeast
CrHsf10-YER	GATATCTGCAGAATTCTTATTTAGGAGTTGAGGC
CrHsf15-YEF	TACCGAGCTCGGATCCATGGAAGGATCAGGTCCGG	Primer pair for construction of CrHsf15-pYES2 for functional verification in yeast
CrHsf15-YER	GATATCTGCAGAATTCTCAAAGTGTGCGCCGATCC
CrHsf17-YEF	TACCGAGCTCGGATCCATGGGAGAAGAACAAGTAAG	Primer pair for construction of CrHsf17-pYES2 for functional verification in yeast
CrHsf17-YER	GATATCTGCAGAATTCTCAACTAGTTTGTCCCACC
CrHsf23-YEF	TACCGAGCTCGGATCCATGGAGGGAGCATCGTGG	Primer pair for construction of CrHsf23-pYES2 for functional verification in yeast
CrHsf23-YER	GATATCTGCAGAATTCTTAGGACTCCGAAGCAAGAAG
